# Supplementary material for: Informant-based assessment instruments for dementia and their measurement properties in persons with intellectual disability: systematic review protocol
Source: PubMed Central journal article supplement — BMJ Open. 2020 Dec 8;10(12):e040920. doi: 10.1136/bmjopen-2020-040920 (PMC7725090; doi:10.1136/bmjopen-2020-040920), 2020-12-08
Supplement: bmjopen-2020-040920.draft_revisions.pdf [file bmjopen-2020-040920.draft_revisions.pdf]

# BMJ Open

BMJ Open is committed to open peer review. As part of this commitment we make the peer review history of every article we publish publicly available.

When an article is published we post the peer reviewers' comments and the authors' responses online. We also post the versions of the paper that were used during peer review. These are the versions that the peer review comments apply to.

The versions of the paper that follow are the versions that were submitted during the peer review process. They are not the versions of record or the final published versions. They should not be cited or distributed as the published version of this manuscript.

BMJ Open is an open access journal and the full, final, typeset and author-corrected version of record of the manuscript is available on our site with no access controls, subscription charges or pay-per-view fees (<http://bmjopen.bmj.com>).

If you have any questions on BMJ Open's open peer review process please email [info.bmjopen@bmj.com](mailto:info.bmjopen@bmj.com)

# BMJ Open

## Informant-based assessment instruments for dementia and their measurement properties in persons with intellectual disability: a systematic review protocol

|                               |                                                                                                                                                                                                                                                                                      |
|-------------------------------|--------------------------------------------------------------------------------------------------------------------------------------------------------------------------------------------------------------------------------------------------------------------------------------|
| Journal:                      | <i>BMJ Open</i>                                                                                                                                                                                                                                                                      |
| Manuscript ID                 | bmjopen-2020-040920                                                                                                                                                                                                                                                                  |
| Article Type:                 | Protocol                                                                                                                                                                                                                                                                             |
| Date Submitted by the Author: | 25-May-2020                                                                                                                                                                                                                                                                          |
| Complete List of Authors:     | Zeilinger, Elisabeth; Universitat Wien, Faculty of Psychology<br>Komenda, Sophie; Universität Wien, Faculty of Psychology<br>Zrnic, Irina; Universität Wien, Faculty of Psychology<br>Franken, Fabian; independent<br>Woditschka, Katharina; Universität Wien, Faculty of Psychology |
| Keywords:                     | MENTAL HEALTH, Dementia < NEUROLOGY, Old age psychiatry < PSYCHIATRY, STATISTICS & RESEARCH METHODS                                                                                                                                                                                  |
|                               |                                                                                                                                                                                                                                                                                      |

SCHOLARONE™  
Manuscripts

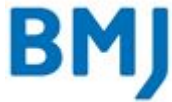

I, the Submitting Author has the right to grant and does grant on behalf of all authors of the Work (as defined in the below author licence), an exclusive licence and/or a non-exclusive licence for contributions from authors who are: i) UK Crown employees; ii) where BMJ has agreed a CC-BY licence shall apply, and/or iii) in accordance with the terms applicable for US Federal Government officers or employees acting as part of their official duties; on a worldwide, perpetual, irrevocable, royalty-free basis to BMJ Publishing Group Ltd ("BMJ") its licensees and where the relevant Journal is co-owned by BMJ to the co-owners of the Journal, to publish the Work in this journal and any other BMJ products and to exploit all rights, as set out in our [licence](#).

The Submitting Author accepts and understands that any supply made under these terms is made by BMJ to the Submitting Author unless you are acting as an employee on behalf of your employer or a postgraduate student of an affiliated institution which is paying any applicable article publishing charge ("APC") for Open Access articles. Where the Submitting Author wishes to make the Work available on an Open Access basis (and intends to pay the relevant APC), the terms of reuse of such Open Access shall be governed by a Creative Commons licence – details of these licences and which [Creative Commons](#) licence will apply to this Work are set out in our licence referred to above.

Other than as permitted in any relevant BMJ Author's Self Archiving Policies, I confirm this Work has not been accepted for publication elsewhere, is not being considered for publication elsewhere and does not duplicate material already published. I confirm all authors consent to publication of this Work and authorise the granting of this licence.

1  
2  
3 1 Title: Informant-based assessment instruments for dementia and their  
4  
5  
6 2 measurement properties in persons with intellectual disability: a systematic  
7  
8  
9 3 review protocol  
10  
11  
12 4

13  
14 5 **Authors and affiliations**

15  
16  
17 6 Elisabeth L. Zeilinger<sup>1\*</sup>: [elisabeth.zeilinger@univie.ac.at](mailto:elisabeth.zeilinger@univie.ac.at)

18  
19 7 Sophie Komenda<sup>1</sup>: [sophie.komenda@univie.ac.at](mailto:sophie.komenda@univie.ac.at)

20  
21 8 Irina Zrnic<sup>1</sup>: [irina.zrnic@univie.ac.at](mailto:irina.zrnic@univie.ac.at)

22  
23 9 Fabian Franken<sup>2</sup>: [fabian.franken@outlook.com](mailto:fabian.franken@outlook.com)

24  
25 10 Katharina Woditschka<sup>2</sup>: [katharina.woditschka@gmail.com](mailto:katharina.woditschka@gmail.com)

26  
27  
28 12 <sup>1</sup> Faculty of Psychology, University of Vienna, Vienna, Austria

29  
30 13 <sup>2</sup> independent

31  
32  
33 14  
34  
35 15 \* Correspondence:

36 16 Elisabeth Zeilinger

37 17 Faculty of Psychology, University of Vienna

38 18 Liebiggasse 5

39 19 A-1010 Vienna

40 20 Austria

41  
42  
43 21  
44  
45 22  
46  
47  
48 23 Word count of main text: 2,367 words

49  
50  
51 24

52  
53  
54 25

## 26 **ABSTRACT**

### 27 **Introduction**

28 Persons with intellectual disability (ID) are at a higher risk of developing dementia than  
29 persons without ID, with an expected earlier onset. Assessment methods for the general  
30 population cannot be applied for persons with ID due to their pre-existing intellectual and  
31 functional impairments. As there is no agreed-upon measure to assess dementia in persons  
32 with ID, multiple instruments for this purpose have been developed and adapted in the last  
33 decades. This review aims to identify all available informant-based instruments for the  
34 assessment of dementia in persons with ID and to evaluate and compare them according to  
35 their measurement properties. Additionally, an overview of the amount and quality of  
36 research on these instruments will be provided.

### 37 **Methods and analysis**

38 This review will be conducted and reported according to the PRISMA statement. We will  
39 adhere to the *COnsensus-based Standards for the selection of health Measurement*  
40 *INstruments* (COSMIN) guidelines, and use a set of characteristics developed for assessment  
41 instruments for persons with ID, the *Characteristics of Assessment Instruments for*  
42 *Psychiatric Disorders in Persons with Intellectual Developmental Disorders* (CAPs-IDD).  
43 Two comprehensive, systematic literature searches will be applied in ten international  
44 databases, including ASSIA, CINAHL, Cochrane Library, ERIC, MEDLINE, PsycINFO,  
45 Scopus, Web of Science, OpenGrey, and ProQuest Dissertations & Theses Global. Risk of  
46 bias and quality assessment will be done according to COSMIN guidelines. We will apply the  
47 modified *Grading of Recommendations, Assessment, Development and Evaluation* (GRADE)  
48 approach to rate the overall quality of the available evidence.

## 49 **Ethics and dissemination**

50 No ethics statement is needed for this study. The results will be submitted to a peer-reviewed  
51 journal, and presented at international conferences.

## 52 **Registration details**

53 This review has been submitted for registration to PROSPERO on May 15, 2020.

## 54 **Keywords**

55 mental health, dementia, old age psychiatry, statistics and research methods

## 57 **ARTICLE SUMMARY**

### 58 **Strengths and limitations of this study**

- 59 • This review follows the most up-to-date standards for conducting systematic reviews  
60 on assessment instruments, the PRISMA and COSMIN guidelines, and additionally  
61 uses the CAPs-IDD, a system especially developed for evaluating assessment  
62 instruments for psychiatric disorders in persons with ID.
- 63 • Two very comprehensive consecutive search strategies will be applied in a total of ten  
64 international databases, including grey and unpublished literature.
- 65 • We use language restrictions only for abstracts of studies, not for full texts, trying to  
66 minimise language bias.
- 67 • We only include informant-based instruments assessing dementia in our evaluation,  
68 and exclude direct cognitive tests.
- 69 • Due to expected heterogeneity in studies, a quantitative pooling of psychometric data  
70 will probably not be possible.

## 72 INTRODUCTION

73 Intellectual disability (ID) is characterized by limitations in intellectual functioning (IQ < 70)  
74 and in adaptive behaviour originating in the developmental phase of an individual.[1] It is also  
75 known as Intellectual Developmental Disorder in the *Diagnostic and Statistical Manual of*  
76 *Mental Disorders 5* (DSM-5)[2] and Disorders of Intellectual Development in the *11th*  
77 *Revision of the International Classification of Diseases* (ICD-11).[3] Prevalence of ID is hard  
78 to establish, since in many countries no official records of persons with ID exist.[4] In large  
79 meta-analysis and reviews, the worldwide prevalence of ID is estimated to range from 1% to  
80 3,3%.[5–7]

81 Persons with ID are at the same or higher risk to develop dementia than persons without  
82 ID.[8–10] Yet, it is often hard to recognize dementia in persons with ID, especially at an early  
83 stage. Well-evaluated assessment and screening instruments for the general population, such  
84 as the frequently used Mini-Mental State Examination (MMSE)[11] are not suitable for  
85 persons with ID due to their pre-existing disabilities.[12,13] Diagnostic overshadowing  
86 [16,17] makes it difficult to distinguish symptoms linked to the pre-existing disability from  
87 symptoms caused by the onset of dementia. Additionally, the presentation of dementia in  
88 persons with ID can differ from the presentation in persons without ID, with behavioural  
89 symptoms and personality changes being more frequent and probably earlier in the course of  
90 the illness, especially in persons with Down Syndrome.[18,19] To reliably detect dementia in  
91 persons with ID, it is recommended to compare a baseline assessment with periodic re-  
92 assessments.[14–16] Most dementia assessment methods for persons with ID rely on  
93 informant-based measures. The respondent of these instruments should be a person who  
94 knows the respective person with ID very well, for instance, a family member or care staff. In  
95 contrast to direct tests of cognitive functioning, informant-based instruments can be applied  
96 for all persons with ID, irrespective of their intellectual and functional capacity.

1  
2  
3 97 Early recognition of dementia is particularly important to start early interventions, to plan for  
4  
5 98 the future, and to get adequate support for family-carers or care staff.[13–15] Not being able  
6  
7  
8 99 to recognize early signs of dementia constitutes a disadvantage for persons with ID, and  
9  
10 100 contradicts the *Convention on the Rights of Persons with Disabilities by the United Nations*  
11  
12 101 (UN-CRPD).[17] Article 25 and 26 of the UN-CRPD require States Parties to ensure that  
13  
14 102 persons with disabilities can get the “highest attainable standard of health without  
15  
16  
17 103 discrimination on the basis of disability.”[17]

18  
19  
20 104 There are several tools and screening instruments in use for the early recognition of dementia  
21  
22 105 in persons with ID.[12,20] One systematic review found 114 instruments and four test-  
23  
24 106 batteries that have been used to assess dementia in persons with ID. However, some of these  
25  
26  
27 107 instruments have never been designed or adapted to be used in persons with ID, or even to  
28  
29 108 assess dementia.[13] Although there are already some reviews summarizing tools and  
30  
31 109 screening instruments in use for assessing dementia in persons with ID,[13,18–20] no  
32  
33 110 systematic review on measurement properties using up-to-date guidelines for review  
34  
35  
36 111 conduction and psychometric evaluation has been conducted so far. Our review adds to the  
37  
38 112 existing body of knowledge by using a very inclusive systematic search of the literature and,  
39  
40 113 most importantly, by providing a systematic evaluation of informant-based dementia  
41  
42  
43 114 assessment instruments following up-to-date guidelines.

44  
45  
46 115 The systematic evaluation will build on the *CO*n*SENSUS*-based *Standards for the selection of*  
47  
48 116 *health Measurement INstruments* (COSMIN) guidelines [21] and the *Characteristics of*  
49  
50 117 *Assessment Instruments for Psychiatric Disorders in Persons with Intellectual Developmental*  
51  
52 118 *Disorders* (CAPs-IDD).[22] The CAPs-IDD is a system especially developed for the  
53  
54  
55 119 structured collection of information and evidence-based evaluation of assessment instruments  
56  
57 120 for persons with ID. We will not only evaluate the instruments, but also the existing body of  
58  
59 121 research. For each instrument, we will systematically summarize the amount and quality of



1  
2  
3 122 available evaluation studies, depicting which measurement properties have been evaluated to  
4  
5 123 what extent, and which measurement properties have not or insufficiently been evaluated.  
6  
7  
8 124 The objectives of this systematic review are to (1) identify informant-based instruments  
9  
10 125 suitable for the assessment of dementia in persons ID, to (2) systematically collect and  
11  
12 126 evaluate information on evaluation data of these instruments, to (3) evaluate and compare the  
13  
14 127 instruments found according to their evaluation data, and to (4) provide a systematic overview  
15  
16 128 of the amount and quality of available research for each instrument and each measurement  
17  
18 129 property.

## 123 **METHODS AND ANALYSIS**

131 This review will be conducted and reported according to the *Preferred Reporting Items for*  
132 *Systematic Reviews and Meta-Analyses* (PRISMA) statement.[23] The review protocol has  
133 been developed using the PRISMA guidelines for protocols (PRISMA-P).[24,25] We will  
134 adhere to the COSMIN guidelines,[21] and complement them with a set of characteristics  
135 especially developed for assessment instruments for persons with ID, the CAPs-IDD.[22] The  
136 systematic review has been submitted for registration with the *International Prospective*  
137 *Register of Systematic Reviews* (PROSPERO) on May 15, 2020 (identification  
138 number:181773). If amendments to the protocol are needed, we will register these in  
139 PROSPERO, including date and rationale. In the final publication of our results, any  
140 amendments to the protocol will be depicted and explained.

### 141 **Search strategy**

142 Two systematic searches will be applied consecutively, and carried out between May 2020  
143 and August 2020. The first search should provide an inventory of available informant-based  
144 assessment instruments for dementia in persons with ID. The goal of the second search is to  
145 locate evaluation studies for each instrument found in the first search. Figure 1 and Figure 2  
146 depict our search strategies using PRISMA flow charts.

## 147 First search

148 To identify instruments we will search in ten international electronic databases, including  
 149 ASSIA, CINAHL, Cochrane Library, ERIC, MEDLINE, PsycINFO, Scopus, Web of Science,  
 150 OpenGrey, and ProQuest Dissertations & Theses Global. The search string is depicted in  
 151 Table 1 and will include various terms for the (1) output of interest, (2) measure of interest,  
 152 and (3) the specified population. As persons with Down Syndrome are very prone to develop  
 153 dementia, this subgroup of persons with ID is included in our search strategy. We will use a  
 154 limit on the timespan of publication in the first search, not including publications before the  
 155 year 2012. Instruments published up to the year of 2012 are summarized in a previous  
 156 systematic review.[13] This review used a very inclusive search strategy and listed all  
 157 assessment instruments that have been used to assess dementia in persons with ID. We will  
 158 examine the total of 114 dementia assessment instruments listed in the review of 2013, and  
 159 include those instruments that are in line with our inclusion criteria.

160 Table 1: Search strategy for the first search

|                        | 1: Output                                                                                                                                     | 2: Measure                       | 3: Population                                                                                                               |
|------------------------|-----------------------------------------------------------------------------------------------------------------------------------------------|----------------------------------|-----------------------------------------------------------------------------------------------------------------------------|
| Search terms           | Assessment instruments                                                                                                                        | Dementia                         | Intellectual disability                                                                                                     |
| Synonyms               | assessment; diagnostic;<br>diagnosis; screening;<br>instrument; tool;<br>measurement;<br>questionnaire;<br>psychometrics; scale;<br>interview | dementia; Alzheimer's<br>disease | intellectual disability;<br>learning disability;<br>intellectual<br>developmental disorder;<br>trisomy 21, Down<br>syndrome |
| Combined and truncated | assess* OR diagnosti*<br>OR screen OR<br>screening* OR                                                                                        | dement* OR<br>Alzheimer*         | ((intellectual* OR<br>learning) AND disab*)<br>OR (intellectual* AND                                                        |

---

|                                                                                                       |                                                                              |
|-------------------------------------------------------------------------------------------------------|------------------------------------------------------------------------------|
| instrument* OR tool*<br>OR measure* OR<br>questionnaire* OR<br>psychometr* OR scale*<br>OR interview* | developmental* AND<br>disorder*) OR trisom*<br>21 OR (down* AND<br>syndrom*) |
|-------------------------------------------------------------------------------------------------------|------------------------------------------------------------------------------|

---

|                                           |                                                                                                                                                                                                                                                                                                                                                                                     |
|-------------------------------------------|-------------------------------------------------------------------------------------------------------------------------------------------------------------------------------------------------------------------------------------------------------------------------------------------------------------------------------------------------------------------------------------|
| Example<br>search<br>string for<br>SCOPUS | TITLE-ABS-KEY ( ( assess* OR diagnosti* OR screen OR screening*<br>OR instrument* OR tool* OR measure* OR questionnaire* OR<br>psychometr* OR scale* OR interview* ) AND ( dement* OR alzheimer*<br>) AND ( ( ( intellectual* OR learning ) AND disab* ) OR ( intellectual*<br>AND developmental* AND disorder* ) OR trisom* 21 OR ( down*<br>AND syndrom* ) ) ) AND PUBYEAR > 2011 |
|-------------------------------------------|-------------------------------------------------------------------------------------------------------------------------------------------------------------------------------------------------------------------------------------------------------------------------------------------------------------------------------------------------------------------------------------|

---

161

162 Inclusion criteria for the first search will be: (1) studies need to focus on assessing dementia  
 163 in persons with ID, (2) include at least one informant-based instrument (development or  
 164 evaluation) for the assessment of dementia, (3) this instrument has to be especially developed  
 165 or adapted for persons with ID, (4) and studies need to have an English language abstract.

166 Exclusion criteria: (1) classification systems like ICD-11, DSM-5, (2) scales including  
 167 dementia, but focusing on a broader spectrum of disorders for screening purposes or  
 168 differential diagnosis.

169 Second search

170 Once we have identified the instruments, we will conduct a search by citation strategy using  
 171 the initial publications of each instrument as a reference point. This search strategy was  
 172 chosen on the assumption that a paper evaluating an instrument would surely cite the initial  
 173 publication of the respective instrument. The papers used as reference points will also be  
 174 included in the further appraisal of the literature. For published papers, we will use five  
 175 international databases allowing a search by citation strategy, including ERIC, PsycInfo,  
 176 MEDLINE, Scopus, and Web of Science. For published manuals, not listed in at least one of  
 177 the five databases, we will use Google Scholar. Additionally, all records fulfilling the

1  
2  
3 178 inclusion and exclusion criteria of the first search will be transferred and examined in the  
4  
5 179 second search.

6  
7  
8 180 The following inclusion criteria will be used in the second search: (1) studies need to describe  
9  
10 181 an evaluation of the respective instrument in persons with ID, and (2) have an English-  
11  
12 182 language abstract. Exclusion criteria: (1) the respective instrument was used primarily for  
13  
14 183 other investigations, not related to an evaluation of the instrument, (2) or the study is a review  
15  
16 184 on assessment instruments, not providing novel information.

17  
18  
19  
20 185 To further include grey and unpublished literature in both searches, we will apply an invisible  
21  
22 186 college approach, contacting authors in the field for information or manuscripts on this topic,  
23  
24 187 and we will follow up on meeting abstracts. Full texts of reviews on assessment instruments  
25  
26 188 identified in the course of the two searches will be screened for possible further studies to  
27  
28 189 include. References of papers meeting the inclusion criteria will be hand-searched. We will  
29  
30 190 re-run the search before the final analyses to include the most recent publications.

31  
32  
33  
34  
35 191 For study selection, one reviewer will exclude duplicates. All remaining records will be  
36  
37 192 screened and reviewed for eligibility by two team members independently, i.e. blinded to each  
38  
39 193 other's decisions. In the case of disagreement, dissonances will be discussed until agreement  
40  
41 194 is reached. In the case of non-agreement, a third team member will be included in discussion.

#### 42 43 44 195 **Data extraction**

45  
46  
47 196 The first search will result in a list of instruments. Data extracted will be the names of the  
48  
49 197 instruments and information on their initial publication(s). In the second search, we will  
50  
51 198 extract evaluation data of instruments, i.e. measurement properties and characteristics as listed  
52  
53 199 in the COSMIN checklist and the CAPs-IDD. For each characteristic/property extracted, we  
54  
55 200 will record the study design and sample characteristics, including sample size, gender  
56  
57 201 distribution, age distribution, and aetiology of ID. We will include all studies, irrespective of  
58  
59 202 their design, but apply the COSMIN quality rating.

1  
2  
3 203 The extraction of all relevant data will be done via standardised and piloted excel  
4  
5 204 spreadsheets by two team members independently. In the case of disagreement, dissonances  
6  
7 205 will be discussed until agreement is reached. In the case of non-agreement, a third team  
8  
9 206 member will be included in discussion. If we find important data missing in a study, we will  
10  
11 207 contact study authors for this information.  
12  
13  
14

### 15 208 **Risk of bias and quality assessment**

16  
17 209 Quality and risk of bias will be assessed on study level, on single outcome level, and on an  
18  
19 210 aggregated outcome level, i.e. for each study, each measurement property, and each  
20  
21 211 assessment instrument. We will combine the COSMIN checklists [26–28] with the CAPs-IDD  
22  
23 212 [22], a comprehensive tool especially developed for the evaluation of assessment instruments  
24  
25 213 for psychiatric disorders in persons with ID.  
26  
27  
28

29  
30 214 All ratings will be done by two reviewers independently. In the case of disagreement,  
31  
32 215 dissonances will be discussed until agreement is reached. In the case of non-agreement, a  
33  
34 216 third team member will be included in the discussion. Initial interrater agreement will be  
35  
36 217 determined using Cohen's Kappa, calculated in R.[29] The quality rating of the studies will  
37  
38 218 go into the final appraisal of the quality of available evaluation data for each instrument.  
39  
40  
41

42 219 As to publication bias, we assume that evaluation results not in favour of the respective  
43  
44 220 instruments are likely to be underreported. This may be partly due to evaluations being  
45  
46 221 frequently done and published by the author(s) of the respective instrument. We will address  
47  
48 222 this by including grey literature and by discussing this aspect in the interpretation of our  
49  
50 223 results.  
51  
52  
53

### 54 224 **Strategy for data synthesis**

55  
56 225 A narrative synthesis will be conducted. Assessment instruments will be presented in a table  
57  
58 226 along with their measurement properties and quality ratings according to CAPs-IDD and the  
59  
60 227 COSMIN checklists. Data pooling will probably not be possible. This is due to an expected

1  
2  
3 228 limited number of studies evaluating the same property (e.g. internal consistency) for an  
4  
5 229 instrument, and an expected heterogeneity in the population studied (e.g. severity of ID,  
6  
7 230 persons with Down syndrome vs. persons with ID of other aetiology). However, if applicable,  
8  
9 231 we will calculate pooled estimates and 95% confidence intervals using R.[29]  
10  
11  
12

### 13 232 **Analysis of subgroups**

14  
15 233 We define persons with Down syndrome/trisomy 21 (DS) as a special subgroup, as they are  
16  
17 234 more often affected by Alzheimer's dementia, with a suspected earlier onset.[30] We will  
18  
19 235 group instruments according to their intended use, and studies according to their participants  
20  
21 236 in four clusters: (1) persons with ID, including persons with DS, (2) only persons with DS, (3)  
22  
23 237 only persons with ID, not including DS, (4) aetiology of ID not specified. For the fourth  
24  
25 238 cluster, we will contact study authors to determine aetiology of ID in the respective sample or  
26  
27 239 for the respective instrument. We will then allocate each study or instrument to the first three  
28  
29 240 clusters according to the information provided by the authors. If no information is provided,  
30  
31 241 the respective study or instrument remains in cluster four.  
32  
33  
34  
35

### 36 242 **Confidence in cumulative evidence**

37  
38 243 The modified *Grading of Recommendations, Assessment, Development and Evaluation*  
39  
40 244 (GRADE) approach as suggested by the COSMIN guidelines[21] will be applied to grade the  
41  
42 245 quality of the evidence.  
43  
44  
45

### 46 246 **Data management**

47  
48 247 We will use ZOTERO for saving records and managing and storing literature. For extracting  
49  
50 248 data and recording decisions on quality ratings we will use standardised and piloted excel  
51  
52 249 spreadsheets.  
53  
54  
55

### 56 250 **Patient and public involvement**

57  
58 251 This research was done without patient involvement due to limited resources.  
59  
60

## 252 **DISCUSSION**

253 This review will summarize measurement properties of available informant-based assessment  
254 instruments for persons with ID and give an overview of the quality of each instrument and  
255 the quality of available evaluation studies. For each instrument we will depict which  
256 psychometric properties are evaluated to what extent, and which properties need further  
257 evaluation in future research. This will be the first systematic review of dementia assessment  
258 instruments for persons with ID using the PRISMA and COSMIN guidelines as well as  
259 applying ID-specific criteria of the CAPs-IDD.

260 Our work will highlight gaps in research on these instruments, thus setting the ground for  
261 more effective research in the future. The results of this review will inform researchers and  
262 clinicians of the quality of available instruments to assess dementia in persons with ID, and  
263 guide them in choosing an adequate instrument. This will hopefully contribute to an  
264 improvement of dementia assessment in persons with ID and a better, earlier, and more  
265 adequate provision of healthcare services, as demanded by the UN-CRPD.[17]

### 266 **Ethics and dissemination**

267 No ethics statement is needed for this study. The results of this systematic review will be  
268 submitted for publication to a leading peer-reviewed journal, and presented at international  
269 conferences and congresses in the fields of ID, ageing, and dementia.

270

### 271 **Author contributions**

272 ELZ conceived the study, drafted the protocol, and is the guarantor of the review. SK, IZ and  
273 FF contributed to study design and drafting the protocol. ELZ, SK, and KW designed and  
274 tested the search strategy. FF and IZ tested quality rating tools and software options. All  
275 authors read and approved the final protocol.

1  
2  
3 276 **Funding**  
4

5 277 This research received no specific grant from any funding agency in the public, commercial or  
6  
7 278 not-for-profit sectors.  
8  
9

10 279 **Acknowledgments**  
11

12  
13 280 Open access funding provided by University of Vienna.  
14  
15

16 281 **Patient and public involvement**  
17

18 282 This research was done without patient involvement.  
19  
20

21 283 **Competing interests**  
22

23 284 The authors have no competing nor potential conflict interests to declare.  
24  
25

26 285 **Word count of main text:** 2,367 words  
27  
28

29 286  
30  
31

32 287 **REFERENCES**  
33

- 34  
35 288 1 Schalock RL, Borthwick-Duffy SA, Bradley VJ, *et al.* *Intellectual Disability:*  
36  
37 289 *Definition, Classification, and Systems of Supports.* 11th ed. Washington, DC: : American  
38  
39 290 Association on Intellectual and Developmental Disabilities 2010.  
40  
41  
42  
43 291 2 American Psychiatric Association. *Diagnostic and statistical manual of mental*  
44  
45 292 *disorders.* Washington, DC: : Author 2013.  
46  
47  
48  
49 293 3 World Health Organization. *International classification of diseases (11th Revision).*  
50  
51 294 2018. <https://icd.who.int/en>  
52  
53  
54 295 4 Holt G, Costello H, Bouras H, *et al.* BIOMED-MEROPE project: service provision for  
55  
56 296 adults with intellectual disability: a European comparison. *J Intellect Disabil Res*  
57  
58 297 2000;**44**:685–96. doi:10.1046/j.1365-2788.2000.00312.x  
59  
60



- 1  
2  
3 298 5 Durkin M. The epidemiology of developmental disabilities in low-income countries.  
4  
5 299 *Ment Retard Dev Disabil Res Rev* 2002;**8**:206–11. doi:10.1002/mrdd.10039  
6  
7  
8 300 6 Maulik PK, Mascarenhas MN, Mathers CD, *et al.* Prevalence of intellectual disability:  
9  
10 a meta-analysis of population-based studies. *Res Dev Disabil* 2011;**32**:419–36.  
11  
12  
13 302 doi:10.1016/j.ridd.2010.12.018  
14  
15  
16 303 7 Roeleveld N, Zielhuis GA, Gabreëls F. The prevalence of mental retardation: a critical  
17  
18 review of recent literature. *Dev Med Child Neurol* 1997;**39**:125–32. doi:10.1111/j.1469-  
19 304 8749.1997.tb07395.x  
20  
21  
22  
23  
24 306 8 Strydom A, Hassiotis A, King M, *et al.* The relationship of dementia prevalence in  
25  
26 older adults with intellectual disability (ID) to age and severity of ID. *Psychol Med*  
27 307 2009;**39**:13–21. doi:10.1017/S0033291708003334  
28  
29  
30  
31  
32 309 9 Strydom A, Chan T, King M, *et al.* Incidence of dementia in older adults with  
33  
34 intellectual disabilities. *Res Dev Disabil* 2013;**34**:1881–1885.  
35 310  
36  
37 311 doi:10.1016/j.ridd.2013.02.021  
38  
39  
40 312 10 Takenoshita S, Terada S, Kuwano R, *et al.* Prevalence of dementia in people with  
41  
42 intellectual disabilities: cross-sectional study. *Int J Geriatr Psychiatry* 2020;**35**:414–22.  
43 313  
44  
45 314 doi:10.1002/gps.5258  
46  
47  
48 315 11 Folstein MF, Folstein SE, McHugh PR. “Mini-mental state”: a practical method for  
49  
50 grading the cognitive state of patients for the clinician. *J Psychiatr Res* 1975;**12**:189–98.  
51 316  
52  
53 317 doi:10.1016/0022-3956(75)90026-6  
54  
55  
56 318 12 Burt DB. Issues in dementia assessment methods. In: Prasher VP, ed.  
57  
58 319 *Neuropsychological Assessment of Dementia in Down Syndrome and Intellectual*  
59  
60 320 *Disabilities*. Cham, Switzerland: : Springer 2018.

- 1  
2  
3 321 13 Zeilinger EL, Stiehl KA, Weber G. A systematic review on assessment instruments for  
4  
5 322 dementia in persons with intellectual disabilities. *Res Dev Disabil* 2013;**34**:3962–3977.  
6  
7 323 doi:10.1016/j.ridd.2013.08.013  
8  
9  
10  
11 324 14 Aylward EH, Burt DB, Thorpe LU, *et al.* Diagnosis of dementia in individuals with  
12  
13 325 intellectual disability. *J Intellect Disabil Res* 1997;**41**:152–64. doi:10.1111/j.1365-  
14  
15 326 2788.1997.tb00692.x  
16  
17  
18  
19 327 15 Deb S, McHugh R. Dementia among Persons with Down Syndrome. In: Urbano RC,  
20  
21 328 ed. *International Review of Research in Mental Retardation*. Academic Press 2010. 221–  
22  
23 329 55. doi:10.1016/S0074-7750(10)39008-2  
24  
25  
26  
27 330 16 Kalsy S, Oliver C. The Assessment of Dementia in People with Intellectual  
28  
29 331 Disabilities: Key Assessment Instruments. In: *Assessing Adults with Intellectual*  
30  
31 332 *Disabilities*. John Wiley & Sons, Ltd 2008. 207–19. doi:10.1002/9780470773697.ch15  
32  
33  
34  
35 333 17 United Nations. *Convention on the Rights of Persons with Disabilities*. New York: :  
36  
37 334 United Nations 2006.  
38  
39  
40 335 18 McKenzie K, Metcalfe D, Murray G. A review of measures used in the screening,  
41  
42 336 assessment and diagnosis of dementia in people with an intellectual disability. *Rev J Appl*  
43  
44 337 *Res Intellect Disabil* 2018;**31**:725–742. doi:10.1111/jar.12441  
45  
46  
47  
48 338 19 Elliott-King J, Shaw S, Bandelow S, *et al.* A critical literature review of the  
49  
50 339 effectiveness of various instruments in the diagnosis of dementia in adults with intellectual  
51  
52 340 disabilities. *Alzheimers Dement Diagn Assess Dis Monit* 2016;**4**:126–48.  
53  
54 341 doi:10.1016/j.dadm.2016.06.002  
55  
56  
57  
58 342 20 Sabbagh M, Edgin J. Clinical assessment of cognitive decline in adults with Down  
59  
60 343 syndrome. *Curr Alzheimer Res* 2016;**13**:30–4. doi:10.2174/1567205012666150921095724

- 1  
2  
3 344 21 Prinsen CAC, Mokkink LB, Bouter LM, *et al.* COSMIN guideline for systematic  
4  
5 345 reviews of patient-reported outcome measures. *Qual Life Res* 2018;**27**:1147–57.  
6  
7 346 doi:10.1007/s11136-018-1798-3  
8  
9  
10  
11 347 22 Zeilinger EL, Nader IW, Brehmer-Rinderer B, *et al.* CAPs-IDD: Characteristics of  
12  
13 348 Assessment Instruments for Psychiatric Disorders in Persons with Intellectual  
14  
15 349 Developmental Disorders. *J Intellect Disabil Res* 2013;**57**:737–46. doi:10.1111/jir.12003  
16  
17  
18  
19 350 23 Moher D, Liberati A, Tetzlaff J, *et al.* Preferred Reporting Items for Systematic  
20  
21 351 Reviews and Meta-Analyses: The PRISMA Statement. *Ann Intern Med* 2009;**151**:264.  
22  
23 352 doi:10.7326/0003-4819-151-4-200908180-00135  
24  
25  
26  
27 353 24 Moher D, Shamseer L, Clarke M, *et al.* Preferred reporting items for systematic  
28  
29 354 review and meta-analysis protocols (PRISMA-P) 2015 statement. *Syst Rev* 2015;**4**:1.  
30  
31 355 doi:10.1186/2046-4053-4-1  
32  
33  
34  
35 356 25 Shamseer L, Moher D, Clarke M, *et al.* Preferred reporting items for systematic  
36  
37 357 review and meta-analysis protocols (PRISMA-P) 2015: elaboration and explanation. *BMJ*  
38  
39 358 2015;**349**. doi:10.1136/bmj.g7647  
40  
41  
42  
43 359 26 Mokkink LB, Prinsen C, Patrick DL, *et al.* *COSMIN methodology for systematic*  
44  
45 360 *reviews of patient-reported outcome measures (PROMs) - user manual*. Amsterdam, The  
46  
47 361 Netherlands: : VU University Medical Center 2018.  
48  
49  
50  
51 362 27 Terwee CB, Prinsen CA, Chiarotto A, *et al.* *COSMIN methodology for assessing the*  
52  
53 363 *content validity of PROMs – user manual*. Amsterdam, The Netherlands: : VU University  
54  
55 364 Medical Center 2018.  
56  
57  
58  
59  
60

1  
2  
3 365 28 Mokkink LB, de Vet HCW, Prinsen CAC, *et al.* COSMIN Risk of Bias checklist for  
4  
5 366 systematic reviews of Patient-Reported Outcome Measures. *Qual Life Res* 2018;**27**:1171–  
6  
7 367 9. doi:10.1007/s11136-017-1765-4  
8  
9

10  
11 368 29 R Core Team. *R: A Language and Environment for Statistical Computing*. Vienna,  
12  
13 369 Austria: : R Foundation for Statistical Computing 2020. <https://www.R-project.org/>  
14  
15

16 370 30 Hartley D, Blumenthal T, Carrillo M, *et al.* Down syndrome and Alzheimer's disease:  
17  
18 371 Common pathways, common goals. *Alzheimers Dement J Alzheimers Assoc* 2015;**11**:700–  
19  
20 372 9. doi:10.1016/j.jalz.2014.10.007  
21  
22

23  
24  
25 373

26  
27 374

28  
29 375 **Figure legends**

30  
31  
32 376 Figure 1: PRISMA flow chart of first search  
33

34  
35 377 Figure 2: PRISMA flow chart of second search  
36  
37  
38  
39  
40  
41  
42  
43  
44  
45  
46  
47  
48  
49  
50  
51  
52  
53  
54  
55  
56  
57  
58  
59  
60

1  
2  
3  
4  
5  
6  
7  
8  
9  
10  
11  
12  
13  
14  
15  
16  
17  
18  
19  
20  
21  
22  
23  
24  
25  
26  
27  
28  
29  
30  
31  
32  
33  
34  
35  
36  
37  
38  
39  
40  
41  
42  
43  
44  
45  
46  
47  
48  
49  
50  
51  
52  
53  
54  
55  
56  
57  
58  
59  
60

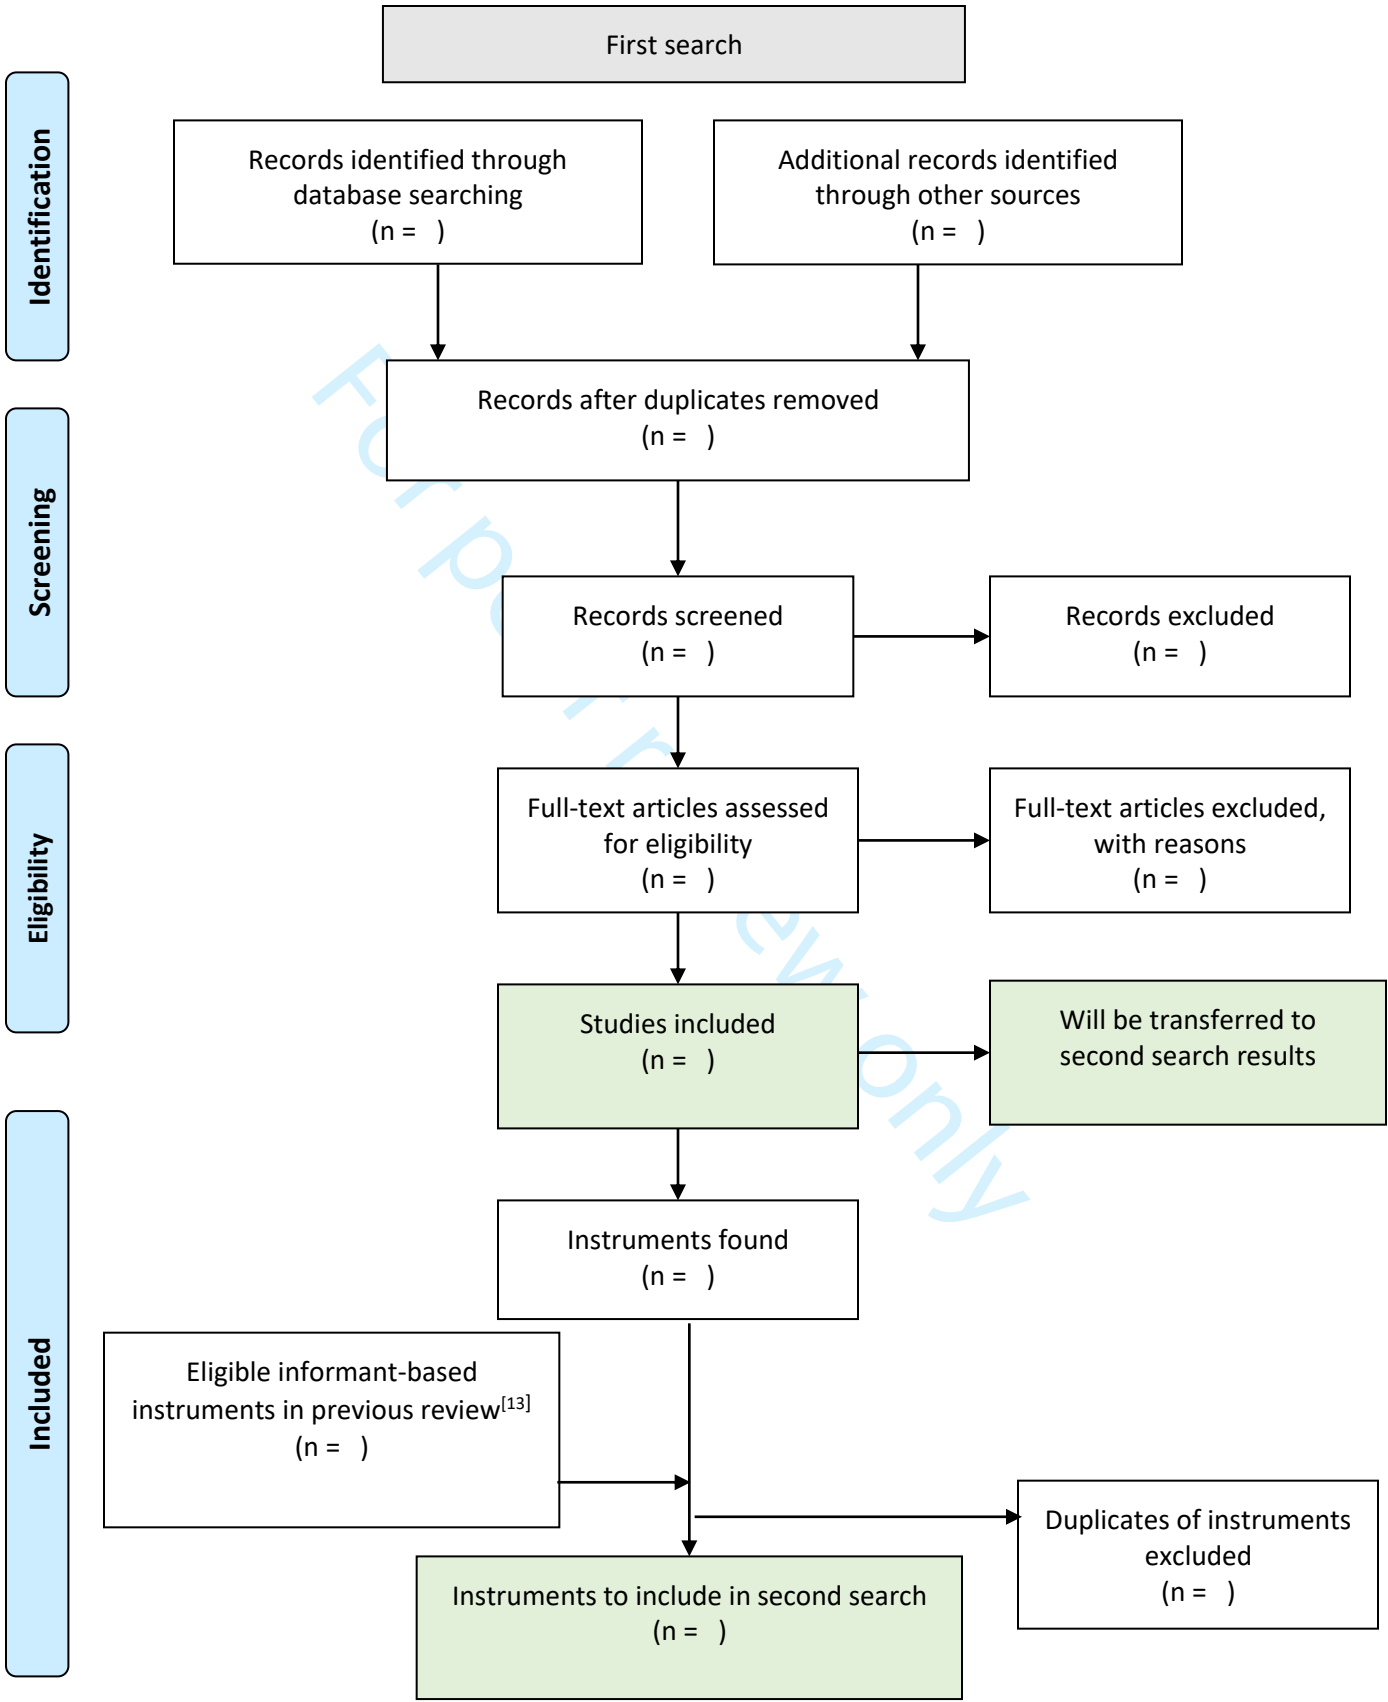

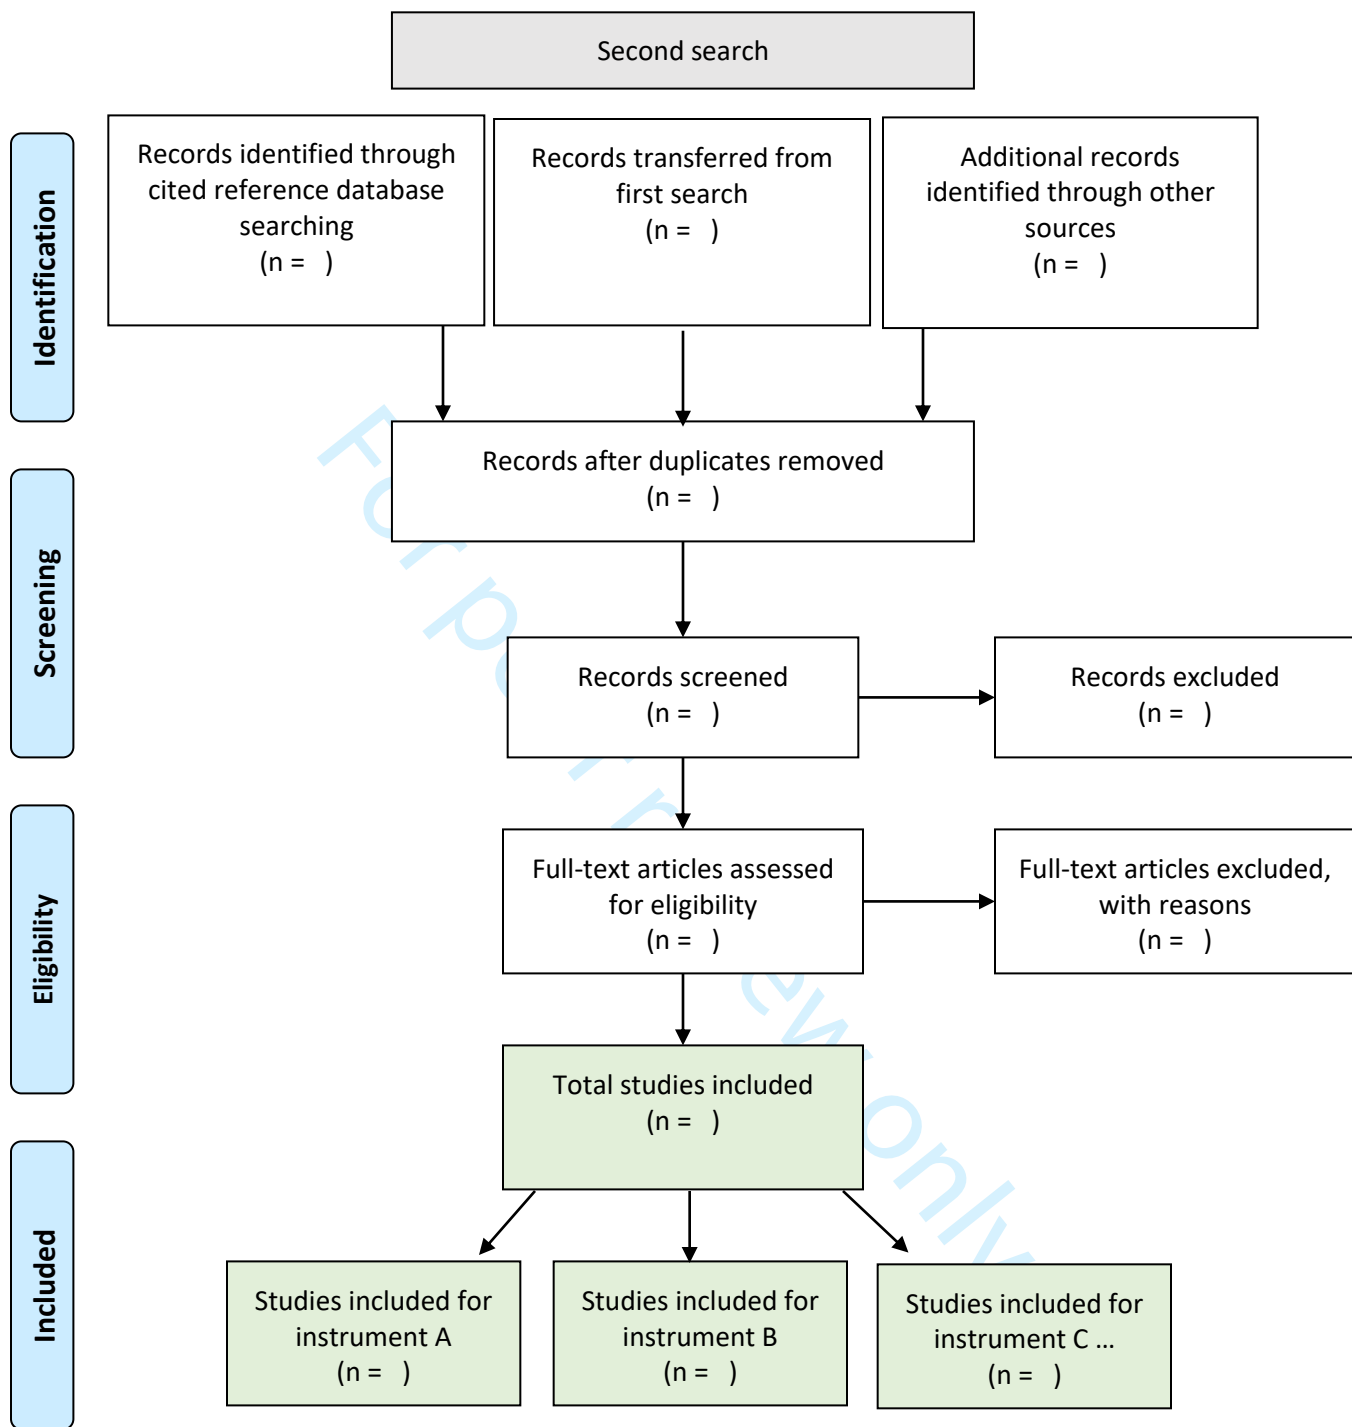

# Reporting checklist for protocol of a systematic review.

Based on the PRISMA-P guidelines.

## Instructions to authors

Complete this checklist by entering the page numbers from your manuscript where readers will find each of the items listed below.

Your article may not currently address all the items on the checklist. Please modify your text to include the missing information. If you are certain that an item does not apply, please write "n/a" and provide a short explanation.

Upload your completed checklist as an extra file when you submit to a journal.

In your methods section, say that you used the PRISMA-Reporting guidelines, and cite them as:

Moher D, Shamseer L, Clarke M, Ghersi D, Liberati A, Petticrew M, Shekelle P, Stewart LA. Preferred Reporting Items for Systematic Review and Meta-Analysis Protocols (PRISMA-P) 2015 statement. Syst Rev. 2015;4(1):1.

|                |                     |                                                          | Page   | Line   |
|----------------|---------------------|----------------------------------------------------------|--------|--------|
| Reporting Item |                     |                                                          | Number | Number |
| <b>Title</b>   |                     |                                                          |        |        |
| Identification | <a href="#">#1a</a> | Identify the report as a protocol of a systematic review | 1      | 2-3    |

|    |                     |                     |                                                    |      |         |
|----|---------------------|---------------------|----------------------------------------------------|------|---------|
| 1  | Update              | <a href="#">#1b</a> | If the protocol is for an update of a previous     | n.a. |         |
| 2  |                     |                     | systematic review, identify as such                |      |         |
| 3  |                     |                     |                                                    |      |         |
| 4  |                     |                     |                                                    |      |         |
| 5  |                     |                     |                                                    |      |         |
| 6  | <b>Registration</b> |                     |                                                    |      |         |
| 7  |                     |                     |                                                    |      |         |
| 8  |                     |                     |                                                    |      |         |
| 9  |                     |                     |                                                    |      |         |
| 10 |                     | <a href="#">#2</a>  | If registered, provide the name of the registry    | 6    | 137-138 |
| 11 |                     |                     | (such as PROSPERO) and registration number         |      |         |
| 12 |                     |                     |                                                    |      |         |
| 13 |                     |                     |                                                    |      |         |
| 14 |                     |                     |                                                    |      |         |
| 15 | <b>Authors</b>      |                     |                                                    |      |         |
| 16 |                     |                     |                                                    |      |         |
| 17 |                     |                     |                                                    |      |         |
| 18 | Contact             | <a href="#">#3a</a> | Provide name, institutional affiliation, e-mail    | 1    | 5-20    |
| 19 |                     |                     | address of all protocol authors; provide physical  |      |         |
| 20 |                     |                     | mailing address of corresponding author            |      |         |
| 21 |                     |                     |                                                    |      |         |
| 22 |                     |                     |                                                    |      |         |
| 23 |                     |                     |                                                    |      |         |
| 24 |                     |                     |                                                    |      |         |
| 25 |                     |                     |                                                    |      |         |
| 26 | Contribution        | <a href="#">#3b</a> | Describe contributions of protocol authors and     | 12   | 271-275 |
| 27 |                     |                     | identify the guarantor of the review               |      |         |
| 28 |                     |                     |                                                    |      |         |
| 29 |                     |                     |                                                    |      |         |
| 30 |                     |                     |                                                    |      |         |
| 31 | <b>Amendments</b>   |                     |                                                    |      |         |
| 32 |                     |                     |                                                    |      |         |
| 33 |                     |                     |                                                    |      |         |
| 34 |                     | <a href="#">#4</a>  | If the protocol represents an amendment of a       | 6    | 138-140 |
| 35 |                     |                     | previously completed or published protocol,        |      |         |
| 36 |                     |                     | identify as such and list changes; otherwise,      |      |         |
| 37 |                     |                     | state plan for documenting important protocol      |      |         |
| 38 |                     |                     | amendments                                         |      |         |
| 39 |                     |                     |                                                    |      |         |
| 40 |                     |                     |                                                    |      |         |
| 41 |                     |                     |                                                    |      |         |
| 42 |                     |                     |                                                    |      |         |
| 43 |                     |                     |                                                    |      |         |
| 44 |                     |                     |                                                    |      |         |
| 45 |                     |                     |                                                    |      |         |
| 46 | <b>Support</b>      |                     |                                                    |      |         |
| 47 |                     |                     |                                                    |      |         |
| 48 |                     |                     |                                                    |      |         |
| 49 | Sources             | <a href="#">#5a</a> | Indicate sources of financial or other support for | 13   | 276-278 |
| 50 |                     |                     | the review                                         |      |         |
| 51 |                     |                     |                                                    |      |         |
| 52 |                     |                     |                                                    |      |         |
| 53 |                     |                     |                                                    |      |         |
| 54 |                     |                     |                                                    |      |         |
| 55 | Sponsor             | <a href="#">#5b</a> | Provide name for the review funder and / or        | n.a. |         |
| 56 |                     |                     | sponsor                                            |      |         |
| 57 |                     |                     |                                                    |      |         |
| 58 |                     |                     |                                                    |      |         |
| 59 |                     |                     |                                                    |      |         |
| 60 |                     |                     |                                                    |      |         |



|    |                      |                     |                                                    |                  |
|----|----------------------|---------------------|----------------------------------------------------|------------------|
| 1  | Role of sponsor      | <a href="#">#5c</a> | Describe roles of funder(s), sponsor(s), and / or  | n.a.             |
| 2  |                      |                     |                                                    |                  |
| 3  | or funder            |                     | institution(s), if any, in developing the protocol |                  |
| 4  |                      |                     |                                                    |                  |
| 5  |                      |                     |                                                    |                  |
| 6  | <b>Introduction</b>  |                     |                                                    |                  |
| 7  |                      |                     |                                                    |                  |
| 8  |                      |                     |                                                    |                  |
| 9  |                      |                     |                                                    |                  |
| 10 | Rationale            | <a href="#">#6</a>  | Describe the rationale for the review in the       | 5 104-114        |
| 11 |                      |                     | context of what is already known                   |                  |
| 12 |                      |                     |                                                    |                  |
| 13 |                      |                     |                                                    |                  |
| 14 |                      |                     |                                                    |                  |
| 15 | Objectives           | <a href="#">#7</a>  | Provide an explicit statement of the question(s)   | 6 124-129        |
| 16 |                      |                     | the review will address with reference to          |                  |
| 17 |                      |                     | participants, interventions, comparators, and      |                  |
| 18 |                      |                     | outcomes (PICO)                                    |                  |
| 19 |                      |                     |                                                    |                  |
| 20 |                      |                     |                                                    |                  |
| 21 |                      |                     |                                                    |                  |
| 22 |                      |                     |                                                    |                  |
| 23 |                      |                     |                                                    |                  |
| 24 |                      |                     |                                                    |                  |
| 25 | <b>Methods</b>       |                     |                                                    |                  |
| 26 |                      |                     |                                                    |                  |
| 27 |                      |                     |                                                    |                  |
| 28 | Eligibility criteria | <a href="#">#8</a>  | Specify the study characteristics (such as PICO,   | 7-8, 9 153-168,  |
| 29 |                      |                     | study design, setting, time frame) and report      | 180-184          |
| 30 |                      |                     | characteristics (such as years considered,         |                  |
| 31 |                      |                     | language, publication status) to be used as        |                  |
| 32 |                      |                     | criteria for eligibility for the review            |                  |
| 33 |                      |                     |                                                    |                  |
| 34 |                      |                     |                                                    |                  |
| 35 |                      |                     |                                                    |                  |
| 36 |                      |                     |                                                    |                  |
| 37 |                      |                     |                                                    |                  |
| 38 |                      |                     |                                                    |                  |
| 39 |                      |                     |                                                    |                  |
| 40 | Information          | <a href="#">#9</a>  | Describe all intended information sources (such    | 7, 8, 9 148-150, |
| 41 |                      |                     | as electronic databases, contact with study        | 174-177,         |
| 42 | sources              |                     | authors, trial registers or other grey literature  | 185-190          |
| 43 |                      |                     | sources) with planned dates of coverage            |                  |
| 44 |                      |                     |                                                    |                  |
| 45 |                      |                     |                                                    |                  |
| 46 |                      |                     |                                                    |                  |
| 47 |                      |                     |                                                    |                  |
| 48 |                      |                     |                                                    |                  |
| 49 |                      |                     |                                                    |                  |
| 50 | Search strategy      | <a href="#">#10</a> | Present draft of search strategy to be used for at | 8 160-161        |
| 51 |                      |                     | least one electronic database, including planned   |                  |
| 52 |                      |                     | limits, such that it could be repeated             |                  |
| 53 |                      |                     |                                                    |                  |
| 54 |                      |                     |                                                    |                  |
| 55 |                      |                     |                                                    |                  |
| 56 |                      |                     |                                                    |                  |
| 57 |                      |                     |                                                    |                  |
| 58 |                      |                     |                                                    |                  |
| 59 |                      |                     |                                                    |                  |
| 60 |                      |                     |                                                    |                  |

|    |                    |                      |                                                      |      |         |
|----|--------------------|----------------------|------------------------------------------------------|------|---------|
| 1  | Study records -    | <a href="#">#11a</a> | Describe the mechanism(s) that will be used to       | 11   | 246-249 |
| 2  |                    |                      |                                                      |      |         |
| 3  | data               |                      | manage records and data throughout the review        |      |         |
| 4  |                    |                      |                                                      |      |         |
| 5  | management         |                      |                                                      |      |         |
| 6  |                    |                      |                                                      |      |         |
| 7  |                    |                      |                                                      |      |         |
| 8  |                    |                      |                                                      |      |         |
| 9  | Study records -    | <a href="#">#11b</a> | State the process that will be used for selecting    | 9    | 191-194 |
| 10 |                    |                      |                                                      |      |         |
| 11 | selection          |                      | studies (such as two independent reviewers)          |      |         |
| 12 |                    |                      |                                                      |      |         |
| 13 | process            |                      | through each phase of the review (that is,           |      |         |
| 14 |                    |                      |                                                      |      |         |
| 15 |                    |                      | screening, eligibility and inclusion in meta-        |      |         |
| 16 |                    |                      | analysis)                                            |      |         |
| 17 |                    |                      |                                                      |      |         |
| 18 |                    |                      |                                                      |      |         |
| 19 |                    |                      |                                                      |      |         |
| 20 |                    |                      |                                                      |      |         |
| 21 | Study records -    | <a href="#">#11c</a> | Describe planned method of extracting data from      | 10   | 203-207 |
| 22 |                    |                      |                                                      |      |         |
| 23 | data collection    |                      | reports (such as piloting forms, done                |      |         |
| 24 |                    |                      |                                                      |      |         |
| 25 | process            |                      | independently, in duplicate), any processes for      |      |         |
| 26 |                    |                      |                                                      |      |         |
| 27 |                    |                      | obtaining and confirming data from investigators     |      |         |
| 28 |                    |                      |                                                      |      |         |
| 29 |                    |                      |                                                      |      |         |
| 30 |                    |                      |                                                      |      |         |
| 31 | Data items         | <a href="#">#12</a>  | List and define all variables for which data will be | 9    | 195-202 |
| 32 |                    |                      |                                                      |      |         |
| 33 |                    |                      | sought (such as PICO items, funding sources),        |      |         |
| 34 |                    |                      |                                                      |      |         |
| 35 |                    |                      | any pre-planned data assumptions and                 |      |         |
| 36 |                    |                      |                                                      |      |         |
| 37 |                    |                      | simplifications                                      |      |         |
| 38 |                    |                      |                                                      |      |         |
| 39 |                    |                      |                                                      |      |         |
| 40 |                    |                      |                                                      |      |         |
| 41 | Outcomes and       | <a href="#">#13</a>  | List and define all outcomes for which data will     | n.a. |         |
| 42 |                    |                      |                                                      |      |         |
| 43 | prioritization     |                      | be sought, including prioritization of main and      |      |         |
| 44 |                    |                      |                                                      |      |         |
| 45 |                    |                      | additional outcomes, with rationale                  |      |         |
| 46 |                    |                      |                                                      |      |         |
| 47 |                    |                      |                                                      |      |         |
| 48 | Risk of bias in    | <a href="#">#14</a>  | Describe anticipated methods for assessing risk      | 10   | 208-223 |
| 49 |                    |                      |                                                      |      |         |
| 50 | individual studies |                      | of bias of individual studies, including whether     |      |         |
| 51 |                    |                      |                                                      |      |         |
| 52 |                    |                      | this will be done at the outcome or study level, or  |      |         |
| 53 |                    |                      |                                                      |      |         |
| 54 |                    |                      | both; state how this information will be used in     |      |         |
| 55 |                    |                      |                                                      |      |         |
| 56 |                    |                      | data synthesis                                       |      |         |
| 57 |                    |                      |                                                      |      |         |
| 58 |                    |                      |                                                      |      |         |
| 59 |                    |                      |                                                      |      |         |
| 60 |                    |                      |                                                      |      |         |

|    |                |                      |                                                             |       |         |
|----|----------------|----------------------|-------------------------------------------------------------|-------|---------|
| 1  | Data synthesis | <a href="#">#15a</a> | Describe criteria under which study data will be            | 10-11 | 227-231 |
| 2  |                |                      | quantitatively synthesised                                  |       |         |
| 3  |                |                      |                                                             |       |         |
| 4  |                |                      |                                                             |       |         |
| 5  |                |                      |                                                             |       |         |
| 6  | Data synthesis | <a href="#">#15b</a> | If data are appropriate for quantitative synthesis,         | n.a.  |         |
| 7  |                |                      | describe planned summary measures, methods                  |       |         |
| 8  |                |                      | of handling data and methods of combining data              |       |         |
| 9  |                |                      | from studies, including any planned exploration             |       |         |
| 10 |                |                      | of consistency (such as I <sup>2</sup> , Kendall's $\tau$ ) |       |         |
| 11 |                |                      |                                                             |       |         |
| 12 |                |                      |                                                             |       |         |
| 13 |                |                      |                                                             |       |         |
| 14 |                |                      |                                                             |       |         |
| 15 |                |                      |                                                             |       |         |
| 16 |                |                      |                                                             |       |         |
| 17 |                |                      |                                                             |       |         |
| 18 |                |                      |                                                             |       |         |
| 19 | Data synthesis | <a href="#">#15c</a> | Describe any proposed additional analyses                   | n.a.  |         |
| 20 |                |                      | (such as sensitivity or subgroup analyses, meta-            |       |         |
| 21 |                |                      | regression)                                                 |       |         |
| 22 |                |                      |                                                             |       |         |
| 23 |                |                      |                                                             |       |         |
| 24 |                |                      |                                                             |       |         |
| 25 |                |                      |                                                             |       |         |
| 26 | Data synthesis | <a href="#">#15d</a> | If quantitative synthesis is not appropriate,               | 10    | 224-227 |
| 27 |                |                      | describe the type of summary planned                        |       |         |
| 28 |                |                      |                                                             |       |         |
| 29 |                |                      |                                                             |       |         |
| 30 |                |                      |                                                             |       |         |
| 31 |                |                      |                                                             |       |         |
| 32 | Meta-bias(es)  | <a href="#">#16</a>  | Specify any planned assessment of meta-                     | 10    | 219-223 |
| 33 |                |                      | bias(es) (such as publication bias across                   |       |         |
| 34 |                |                      | studies, selective reporting within studies)                |       |         |
| 35 |                |                      |                                                             |       |         |
| 36 |                |                      |                                                             |       |         |
| 37 |                |                      |                                                             |       |         |
| 38 |                |                      |                                                             |       |         |
| 39 | Confidence in  | <a href="#">#17</a>  | Describe how the strength of the body of                    | 11    | 242-245 |
| 40 | cumulative     |                      | evidence will be assessed (such as GRADE)                   |       |         |
| 41 | evidence       |                      |                                                             |       |         |
| 42 |                |                      |                                                             |       |         |
| 43 |                |                      |                                                             |       |         |
| 44 |                |                      |                                                             |       |         |
| 45 |                |                      |                                                             |       |         |
| 46 |                |                      |                                                             |       |         |

None The PRISMA-P checklist is distributed under the terms of the Creative Commons Attribution License CC-BY 4.0. This checklist can be completed online using <https://www.goodreports.org/>, a tool made by the [EQUATOR Network](#) in collaboration with [Penelope.ai](#)

# BMJ Open

## Informant-based assessment instruments for dementia and their measurement properties in persons with intellectual disability: a systematic review protocol

|                                 |                                                                                                                                                                                                                                                                                      |
|---------------------------------|--------------------------------------------------------------------------------------------------------------------------------------------------------------------------------------------------------------------------------------------------------------------------------------|
| Journal:                        | <i>BMJ Open</i>                                                                                                                                                                                                                                                                      |
| Manuscript ID                   | bmjopen-2020-040920.R1                                                                                                                                                                                                                                                               |
| Article Type:                   | Protocol                                                                                                                                                                                                                                                                             |
| Date Submitted by the Author:   | 30-Sep-2020                                                                                                                                                                                                                                                                          |
| Complete List of Authors:       | Zeilinger, Elisabeth; Universitat Wien, Faculty of Psychology<br>Komenda, Sophie; Universität Wien, Faculty of Psychology<br>Zrnic, Irina; Universität Wien, Faculty of Psychology<br>Franken, Fabian; independent<br>Woditschka, Katharina; Universität Wien, Faculty of Psychology |
| <b>Primary Subject Heading</b>: | Ophthalmology                                                                                                                                                                                                                                                                        |
| Secondary Subject Heading:      | Mental health, Research methods                                                                                                                                                                                                                                                      |
| Keywords:                       | MENTAL HEALTH, Old age psychiatry < PSYCHIATRY, STATISTICS & RESEARCH METHODS, Dementia < NEUROLOGY                                                                                                                                                                                  |
|                                 |                                                                                                                                                                                                                                                                                      |

SCHOLARONE™  
Manuscripts



I, the Submitting Author has the right to grant and does grant on behalf of all authors of the Work (as defined in the below author licence), an exclusive licence and/or a non-exclusive licence for contributions from authors who are: i) UK Crown employees; ii) where BMJ has agreed a CC-BY licence shall apply, and/or iii) in accordance with the terms applicable for US Federal Government officers or employees acting as part of their official duties; on a worldwide, perpetual, irrevocable, royalty-free basis to BMJ Publishing Group Ltd ("BMJ") its licensees and where the relevant Journal is co-owned by BMJ to the co-owners of the Journal, to publish the Work in this journal and any other BMJ products and to exploit all rights, as set out in our [licence](#).

The Submitting Author accepts and understands that any supply made under these terms is made by BMJ to the Submitting Author unless you are acting as an employee on behalf of your employer or a postgraduate student of an affiliated institution which is paying any applicable article publishing charge ("APC") for Open Access articles. Where the Submitting Author wishes to make the Work available on an Open Access basis (and intends to pay the relevant APC), the terms of reuse of such Open Access shall be governed by a Creative Commons licence – details of these licences and which [Creative Commons](#) licence will apply to this Work are set out in our licence referred to above.

Other than as permitted in any relevant BMJ Author's Self Archiving Policies, I confirm this Work has not been accepted for publication elsewhere, is not being considered for publication elsewhere and does not duplicate material already published. I confirm all authors consent to publication of this Work and authorise the granting of this licence.

1  
2  
3 1 Title: Informant-based assessment instruments for dementia and their  
4  
5  
6 2 measurement properties in persons with intellectual disability: a systematic  
7  
8  
9 3 review protocol  
10  
11  
12 4

13  
14 5 **Authors and affiliations**

15  
16  
17 6 Elisabeth L. Zeilinger<sup>1\*</sup>: [elisabeth.zeilinger@univie.ac.at](mailto:elisabeth.zeilinger@univie.ac.at)

18  
19 7 Sophie Komenda<sup>1</sup>: [sophie.komenda@univie.ac.at](mailto:sophie.komenda@univie.ac.at)

20  
21 8 Irina Zrnic<sup>1</sup>: [irina.zrnic@univie.ac.at](mailto:irina.zrnic@univie.ac.at)

22  
23 9 Fabian Franken<sup>2</sup>: [fabian.franken@outlook.com](mailto:fabian.franken@outlook.com)

24  
25 10 Katharina Woditschka<sup>2</sup>: [katharina.woditschka@gmail.com](mailto:katharina.woditschka@gmail.com)

26  
27  
28 12 <sup>1</sup> Faculty of Psychology, University of Vienna, Vienna, Austria

29  
30 13 <sup>2</sup> independent  
31  
32  
33 14

34  
35 15 \* Correspondence:

36 16 Elisabeth Zeilinger

37 17 Faculty of Psychology, University of Vienna

38 18 Liebiggasse 5

39 19 A-1010 Vienna

40 20 Austria  
41  
42  
43 21  
44  
45 22  
46  
47

48 23 Word count of main text: 2,548 words  
49  
50  
51 24  
52  
53  
54 25  
55  
56  
57  
58  
59  
60

## 26 **ABSTRACT**

### 27 **Introduction**

28 Persons with intellectual disability (ID) are at a higher risk of developing dementia than  
29 persons without ID, with an expected earlier onset. Assessment methods for the general  
30 population cannot be applied for persons with ID due to their pre-existing intellectual and  
31 functional impairments. As there is no agreed-upon measure to assess dementia in persons  
32 with ID, multiple instruments for this purpose have been developed and adapted in the last  
33 decades. This review aims to identify all available informant-based instruments for the  
34 assessment of dementia in persons with ID and to evaluate and compare them according to  
35 their measurement properties. Additionally, an overview of the amount and quality of  
36 research on these instruments will be provided.

### 37 **Methods and analysis**

38 This review will be conducted and reported according to the PRISMA statement. We will  
39 adhere to the *COnsensus-based Standards for the selection of health Measurement*  
40 *INstruments* (COSMIN) guidelines, and use a set of characteristics developed for assessment  
41 instruments for persons with ID, the *Characteristics of Assessment Instruments for*  
42 *Psychiatric Disorders in Persons with Intellectual Developmental Disorders* (CAPs-IDD).  
43 Two comprehensive, systematic literature searches will be applied in ten international  
44 databases, including ASSIA, CINAHL, Cochrane Library, ERIC, MEDLINE, PsycINFO,  
45 Scopus, Web of Science, OpenGrey, and ProQuest Dissertations & Theses Global. Risk of  
46 bias and quality assessment will be done according to COSMIN guidelines. We will apply the  
47 modified *Grading of Recommendations, Assessment, Development and Evaluation* (GRADE)  
48 approach to rate the overall quality of the available evidence.

## 49 **Ethics and dissemination**

50 No ethics statement is needed for this study. The results will be submitted to a peer-reviewed  
51 journal, and presented at international conferences.

## 52 **Registration details**

53 PROSPERO registration number: CRD42020181773

## 54 **Keywords**

55 mental health, dementia, old age psychiatry, statistics and research methods

## 57 **ARTICLE SUMMARY**

### 58 **Strengths and limitations of this study**

- 59 • This review follows the most up-to-date standards for conducting systematic reviews  
60 on assessment instruments, the PRISMA and COSMIN guidelines, and additionally  
61 uses the CAPs-IDD, a system especially developed for evaluating assessment  
62 instruments for psychiatric disorders in persons with ID.
- 63 • Two very comprehensive consecutive search strategies will be applied in a total of ten  
64 international databases, including grey and unpublished literature.
- 65 • We use no language restrictions to minimise language bias.
- 66 • We only include informant-based instruments assessing dementia in our evaluation,  
67 and exclude direct cognitive tests.
- 68 • Due to expected heterogeneity in studies, a quantitative pooling of psychometric data  
69 will probably not be possible.



## 72 INTRODUCTION

73 Intellectual disability (ID) is characterized by limitations in intellectual functioning (IQ < 70)  
74 and in adaptive behaviour originating in the developmental phase of an individual.[1] It is also  
75 known as Intellectual Developmental Disorder in the *Diagnostic and Statistical Manual of*  
76 *Mental Disorders 5* (DSM-5)[2] and Disorders of Intellectual Development in the *11th*  
77 *Revision of the International Classification of Diseases* (ICD-11).[3] Prevalence of ID is hard  
78 to establish, since in many countries no official records of persons with ID exist.[4] In large  
79 meta-analysis and reviews, the worldwide prevalence of ID is estimated to range from 1% to  
80 3,3%.[5–7]

81 Persons with ID are at the same or higher risk to develop dementia than persons without  
82 ID.[8–10] Yet, due to their limitations in intellectual functioning, it is often hard to recognize  
83 dementia in this population, especially at an early stage. Well-evaluated assessment and  
84 screening instruments for the general population, such as the frequently used Mini-Mental  
85 State Examination (MMSE)[11] are not suitable for persons with ID due to their pre-existing  
86 disabilities.[12,13] Diagnostic overshadowing[14,15] makes it difficult to distinguish  
87 symptoms linked to the pre-existing disability from symptoms caused by the onset of  
88 dementia. Additionally, the presentation of dementia in persons with ID can differ from the  
89 presentation in persons without ID, with behavioural symptoms and personality changes being  
90 more frequent and probably earlier in the course of the illness, especially in persons with  
91 Down Syndrome.[16,17] To reliably detect dementia in persons with ID, it is recommended to  
92 compare a baseline assessment with periodic re-assessments.[18–20] Most dementia  
93 assessment methods for persons with ID rely on informant-based measures. The respondent of  
94 these instruments should be a person who knows the respective person with ID very well, for  
95 instance, a family member or care staff. In contrast to direct tests of cognitive functioning,

1  
2  
3 96 informant-based instruments can be applied for all persons with ID, irrespective of their  
4  
5 97 intellectual and functional capacity.  
6  
7

8 98 Early recognition of dementia is particularly important to start early interventions, to plan for  
9  
10 99 the future, and to get adequate support for family-carers or care staff.[21–23] Not being able  
11  
12 100 to recognize early signs of dementia constitutes a disadvantage for persons with ID, and  
13  
14 101 contradicts the *Convention on the Rights of Persons with Disabilities by the United Nations*  
15  
16 102 (UN-CRPD).[24] Article 25 and 26 of the UN-CRPD require States Parties to ensure that  
17  
18 103 persons with disabilities can get the “highest attainable standard of health without  
19  
20 104 discrimination on the basis of disability.”[24]  
21  
22  
23  
24

25 105 There are several tools and screening instruments in use for the early recognition of dementia  
26  
27 106 in persons with ID.[13,25] These instruments can be distinguished in three categories:  
28  
29 107 medical test (e.g. fMRI, gene-markers), direct cognitive tests, and informant-based scales,  
30  
31 108 which are also called observer-rated scales. In this review we focus solely on informant-based  
32  
33 109 scales, which include observer-reported outcome measures (ObsROM), as well as clinician-  
34  
35 110 reported outcome measures (ClinROM). [26]  
36  
37  
38  
39

40 111 One systematic review found 114 instruments and four test-batteries that have been used to  
41  
42 112 assess dementia in persons with ID. However, some of these instruments have never been  
43  
44 113 designed or adapted to be used in persons with ID, or even to assess dementia.[13] Although  
45  
46 114 there are already some reviews summarising tools and screening instruments in use for  
47  
48 115 assessing dementia in persons with ID,[13,25,27,28] no systematic review on measurement  
49  
50 116 properties using up-to-date guidelines for review conduction and psychometric evaluation has  
51  
52 117 been conducted so far. We want to provide an inventory of available informant-based  
53  
54 118 instruments and their measurement properties. This should help clinicians and researches in  
55  
56 119 choosing the adequate instrument for their respective purpose. Our review adds to the existing  
57  
58 120 body of knowledge by using a very inclusive systematic search of the literature and, most  
59  
60

1  
2  
3 121 importantly, by providing a systematic evaluation of informant-based dementia assessment  
4  
5 122 instruments following up-to-date guidelines.  
6  
7

8 123 For each instrument, we will systematically summarise the amount and quality of available  
9  
10 124 evaluation studies, depicting which measurement properties have been evaluated to what  
11  
12 125 extent, and which measurement properties have not or insufficiently been evaluated.  
13  
14

15  
16 126 The objectives of this systematic review are to (1) identify informant-based instruments  
17  
18 127 suitable for the assessment of dementia in persons with ID, to (2) provide a systematic  
19  
20 128 overview of descriptive aspects for each instrument (e.g. respondent requirements, response  
21  
22 129 format), to (3) provide a systematic overview of the amount and quality of available research  
23  
24 130 for each instrument and each measurement property, and to (4) provide a recommendation for  
25  
26 131 the most suitable instrument(s) based on all information collected.  
27  
28

## 30 132 **METHODS AND ANALYSIS**

31  
32  
33 133 This review will be conducted and reported according to the *Preferred Reporting Items for*  
34  
35 134 *Systematic Reviews and Meta-Analyses* (PRISMA) statement,[29] and the review protocol has  
36  
37 135 been developed using the PRISMA guidelines for protocols (PRISMA-P).[30,31] We will  
38  
39 136 adhere to the *COnsensus-based Standards for the selection of health Measurement*  
40  
41 137 *INstruments* (COSMIN) guidelines,[32] and complement them with a set of characteristics  
42  
43 138 especially developed for assessment instruments for persons with ID, the *Characteristics of*  
44  
45 139 *Assessment Instruments for Psychiatric Disorders in Persons with Intellectual Developmental*  
46  
47 140 *Disorders* (CAPs-IDD).[33] The systematic review has been registered with the *International*  
48  
49 141 *Prospective Register of Systematic Reviews* (PROSPERO) with registration number  
50  
51 142 CRD42020181773. If amendments to the protocol are needed, we will register these in  
52  
53 143 PROSPERO, including date and rationale. In the final publication of our results, any  
54  
55 144 amendments to the protocol will be depicted and explained.  
56  
57  
58  
59  
60

1  
2  
3 145 **Search strategy**  
4

5 146 Two systematic searches will be applied consecutively, and carried out between May 2020  
6  
7 147 and August 2020. The first search should provide an inventory of available informant-based  
8  
9 148 assessment instruments for dementia in persons with ID. The goal of the second search is to  
10  
11 149 locate evaluation studies for each instrument found in the first search. Figure 1 and Figure 2  
12  
13 150 depict our search strategies using PRISMA flow charts.  
14  
15

16  
17 151 **First search**  
18

19  
20 152 To identify instruments we will search in ten international electronic databases, including  
21  
22 153 ASSIA, CINAHL, Cochrane Library, ERIC, MEDLINE, PsycINFO, Scopus, Web of Science,  
23  
24 154 OpenGrey, and ProQuest Dissertations & Theses Global. The search string is depicted in  
25  
26 155 Table 1 and will include various terms for the (1) output of interest, (2) construct of interest,  
27  
28 156 and (3) the specified population. As persons with Down Syndrome are very prone to develop  
29  
30 157 dementia, this subgroup of persons with ID is included in our search strategy. We will use a  
31  
32 158 limit on the timespan of publication in the first search, not including publications before the  
33  
34 159 year 2012. Instruments published up to the year of 2012 are summarised in a previous  
35  
36 160 systematic review.[13] This review used a very inclusive search strategy and listed all  
37  
38 161 assessment instruments that have been used to assess dementia in persons with ID. We will  
39  
40 162 examine the total of 114 dementia assessment instruments listed in the review of 2013, and  
41  
42 163 include those instruments that are in line with our inclusion criteria.  
43  
44  
45  
46  
47

48 164 Table 1: Search strategy for the first search  
49

|              | 1: Output                                     | 2: Construct                  | 3: Population                                 |
|--------------|-----------------------------------------------|-------------------------------|-----------------------------------------------|
| Search terms | Assessment instruments                        | Dementia                      | Intellectual disability                       |
| Synonyms     | assessment; diagnostic; diagnosis; screening; | dementia; Alzheimer's disease | intellectual disability; learning disability; |

|                                  |                                                                                                                                                                                                                                                                                                                                                                      |                       |                                                                                                                                    |
|----------------------------------|----------------------------------------------------------------------------------------------------------------------------------------------------------------------------------------------------------------------------------------------------------------------------------------------------------------------------------------------------------------------|-----------------------|------------------------------------------------------------------------------------------------------------------------------------|
|                                  | instrument; tool;                                                                                                                                                                                                                                                                                                                                                    |                       | intellectual                                                                                                                       |
|                                  | measurement;                                                                                                                                                                                                                                                                                                                                                         |                       | developmental disorder;                                                                                                            |
|                                  | questionnaire;                                                                                                                                                                                                                                                                                                                                                       |                       | trisomy 21, Down                                                                                                                   |
|                                  | psychometrics; scale;                                                                                                                                                                                                                                                                                                                                                |                       | syndrome                                                                                                                           |
|                                  | interview                                                                                                                                                                                                                                                                                                                                                            |                       |                                                                                                                                    |
| Combined and truncated           | assess* OR diagnosti* OR screen OR screening* OR instrument* OR tool* OR measure* OR questionnaire* OR psychometr* OR scale* OR interview*                                                                                                                                                                                                                           | dement* OR Alzheimer* | ((intellectual* OR learning) AND disab*) OR (intellectual* AND developmental* AND disorder*) OR trisom* 21 OR (down* AND syndrom*) |
| Example search string for SCOPUS | TITLE-ABS-KEY ( ( assess* OR diagnosti* OR screen OR screening* OR instrument* OR tool* OR measure* OR questionnaire* OR psychometr* OR scale* OR interview* ) AND ( dement* OR alzheimer* ) AND ( ( ( intellectual* OR learning ) AND disab* ) OR ( intellectual* AND developmental* AND disorder* ) OR trisom* 21 OR ( down* AND syndrom* ) ) ) AND PUBYEAR > 2011 |                       |                                                                                                                                    |

165

166 Inclusion criteria for the first search will be: (1) studies need to focus on assessing dementia  
 167 in persons with ID, (2) describe the development or evaluation of an informant-based  
 168 instrument for the assessment of dementia, (3) and this instrument has to be especially  
 169 developed or adapted for persons with ID. Exclusion criteria: (1) classification systems like  
 170 ICD-11, DSM-5, (2) scales including dementia, but focusing on a broader spectrum of  
 171 disorders for screening purposes or differential diagnosis, such as the *Psychiatric Assessment*  
 172 *Schedule for Adult with Developmental Disability* (PAS-ADD).[34]

173 Second search

174 Once we have identified the instruments, we will conduct a search by citation strategy using  
 175 the initial publications of each instrument as a reference point. This search strategy was

1  
2  
3 176 chosen on the assumption that a paper evaluating an instrument would surely cite the initial  
4  
5 177 publication of the respective instrument. The papers used as reference points will also be  
6  
7 178 included in the further appraisal of the literature. For published papers, we will use five  
8  
9  
10 179 international databases allowing a search by citation strategy, including ERIC, PsycInfo,  
11  
12 180 MEDLINE, Scopus, and Web of Science. For published manuals, not listed in at least one of  
13  
14 181 the five databases, we will use Google Scholar. Additionally, all records fulfilling the  
15  
16 182 inclusion and exclusion criteria of the first search will be transferred and examined in the  
17  
18 183 second search.

19  
20  
21  
22 184 The following inclusion criterion will be used in the second search: (1) studies need to  
23  
24 185 describe an evaluation of the respective instrument in persons with ID. Exclusion criteria  
25  
26 186 comprise: (1) the respective instrument was used primarily for other investigations, not related  
27  
28 187 to an evaluation of the instrument, (2) or the study is a review on assessment instruments, not  
29  
30 188 providing novel information.

31  
32  
33  
34 189 To further include grey and unpublished literature in both searches, we will apply an invisible  
35  
36 190 college approach, contacting authors in the field for information or manuscripts on this topic,  
37  
38 191 and we will follow up on meeting abstracts. Full texts of reviews on assessment instruments  
39  
40 192 identified in the course of the two searches will be screened for possible further studies to  
41  
42 193 include. References of papers meeting the inclusion criteria will be hand-searched. We will  
43  
44 194 re-run both searches before the final analyses to include the most recent publications.

45  
46  
47  
48 195 For study selection, one reviewer will exclude duplicates. All remaining records will be  
49  
50 196 screened and reviewed for eligibility by two team members independently, i.e. blinded to each  
51  
52 197 other's decisions. In the case of disagreement, dissonances will be discussed until agreement  
53  
54 198 is reached. In the case of non-agreement, a third team member will be included in discussion.

### 199 **Data extraction**

200 The first search will result in a list of instruments. Data extracted will be the names of the

1  
2  
3 201 instruments and information on their initial publication(s). In the second search, we will  
4  
5 202 extract evaluation data of instruments, i.e. measurement properties and characteristics as listed  
6  
7 203 in the COSMIN checklists and the CAPs-IDD. For each characteristic/property extracted, we  
8  
9 204 will record the study design and sample characteristics, including sample size, gender  
10  
11 205 distribution, age distribution, aetiology of ID, and country (language) in which the instrument  
12  
13 206 was evaluated. We will include all studies, irrespective of their design.  
14  
15  
16

17 207 The extraction of all relevant data will be done via standardised and piloted excel  
18  
19 208 spreadsheets by two team members independently. In the case of disagreement, dissonances  
20  
21 209 will be discussed until agreement is reached. In the case of non-agreement, a third team  
22  
23 210 member will be included in discussion. If data necessary for coding is missing in a study, we  
24  
25 211 will contact the respective study authors for this information.  
26  
27  
28

### 29 212 **Risk of bias and quality assessment**

30  
31 213 Quality and risk of bias will be assessed on study level (for each measurement property), on  
32  
33 214 outcome level (for each assessment instrument), and on an aggregated outcome level,  
34  
35 215 applying the *Grading of Recommendations, Assessment, Development and Evaluation*  
36  
37 216 (GRADE) approach. We will combine the COSMIN checklists [35–37] with the CAPs-IDD  
38  
39 217 [33], a comprehensive tool specifically developed for the evaluation of assessment  
40  
41 218 instruments for psychiatric disorders in persons with ID. The CAPs-IDD consists of two parts:  
42  
43 219 (1) conceptual and measurement model (including descriptive aspects of instruments, e.g.  
44  
45 220 respondent requirements, theoretical foundation), and (2) psychometric properties. We will  
46  
47 221 only use the first part, as the second part is more comprehensively covered by the COSMIN  
48  
49 222 checklists.  
50  
51  
52  
53

54  
55 223 All ratings will be done by two reviewers independently. In the case of disagreement,  
56  
57 224 dissonances will be discussed until agreement is reached. In the case of non-agreement, a  
58  
59  
60

1  
2  
3 225 third team member will be included in the discussion. Initial interrater agreement will be  
4  
5 226 determined using percentage agreement, calculated in R.[38]  
6  
7

8 227 As to publication bias, we assume that evaluation results not in favour of the respective  
9  
10 228 instruments are likely to be underreported. This may be partly due to evaluations being  
11  
12 229 frequently done and published by the developer(s) of the respective instrument. We will  
13  
14 230 address this by including grey literature and by discussing this aspect in the interpretation of  
15  
16 231 our results.  
17  
18

### 19 20 232 **Strategy for data synthesis**

21  
22 233 A narrative synthesis will be conducted. Assessment instruments will be presented in a table  
23  
24 234 along with descriptive aspects according to CAPs-IDD, and their measurement properties and  
25  
26 235 quality ratings according to the COSMIN checklists. Quantitative data pooling will probably  
27  
28 236 not be possible. This is due to an expected limited number of studies evaluating the same  
29  
30 237 property (e.g. internal consistency) for an instrument, and an expected heterogeneity in the  
31  
32 238 population studied (e.g. severity of ID, persons with Down Syndrome vs. persons with ID of  
33  
34 239 other aetiology). However, if applicable, we will calculate pooled estimates and 95%  
35  
36 240 confidence intervals using R.[38]  
37  
38  
39  
40  
41

### 42 241 **Analysis of subgroups**

43  
44 242 We define persons with Down Syndrome/trisomy 21 (DS) as a special subgroup, as they are  
45  
46 243 more often affected by Alzheimer's dementia, with a suspected earlier onset.[16] We will  
47  
48 244 group instruments according to their intended use, and studies according to their participants  
49  
50 245 in four clusters: (1) persons with ID, including persons with DS, (2) only persons with DS, (3)  
51  
52 246 only persons with ID, not including DS, (4) aetiology of ID not specified. For the fourth  
53  
54 247 cluster, we will contact study authors to determine aetiology of ID in the respective sample or  
55  
56 248 for the respective instrument. We will then allocate each study or instrument to the first three  
57  
58  
59  
60



1  
2  
3 249 clusters according to the information provided by the authors. If no information is provided,  
4  
5 250 the respective study or instrument remains in cluster four.  
6  
7

### 8 251 **Confidence in cumulative evidence**

9  
10 252 The modified GRADE approach as suggested by the COSMIN guidelines[32] will be applied  
11  
12  
13 253 to grade the quality of the evidence.  
14  
15

### 16 254 **Data management**

17  
18 255 We will use ZOTERO for saving records and managing and storing literature, including  
19  
20 256 managing duplicates. For extracting data and recording decisions on quality ratings we will  
21  
22  
23 257 use standardised and piloted excel spreadsheets.  
24  
25

### 26 258 **Patient and public involvement**

27  
28 259 This research was done without patient involvement due to limited resources.  
29  
30

## 31 260 **DISCUSSION**

32  
33 261 This review will summarise measurement properties of available informant-based assessment  
34  
35 262 instruments for persons with ID and give an overview of the quality of each instrument and  
36  
37  
38 263 the quality of available evaluation studies. For each instrument we will depict which  
39  
40 264 psychometric properties are evaluated to what extent, and which properties need further  
41  
42 265 evaluation in future research. This will be the first systematic review of dementia assessment  
43  
44 266 instruments for persons with ID using PRISMA and COSMIN guidelines as well as applying  
45  
46  
47 267 the ID-specific criteria of the CAPs-IDD.  
48  
49

50 268 Our work will highlight gaps in research on these instruments, thus setting the ground for  
51  
52 269 more effective research in the future. The results of this review will inform researchers and  
53  
54 270 clinicians of the quality of available instruments to assess dementia in persons with ID, and  
55  
56  
57 271 guide them in choosing an adequate instrument. This will hopefully contribute to an  
58  
59  
60

1  
2  
3 272 improvement of dementia assessment in persons with ID and a better, earlier, and more  
4  
5 273 adequate provision of healthcare services, as demanded by the UN-CRPD.[24]  
6  
7

#### 8 274 **Ethics and dissemination**

9  
10 275 No ethics statement is needed for this study. The results of this systematic review will be  
11  
12 276 submitted for publication to a leading peer-reviewed journal, and presented at international  
13  
14 277 conferences and congresses in the fields of ID, ageing, and dementia.  
15  
16  
17

18 278

#### 21 279 **Author's contributions**

22  
23 280 ELZ conceived the study, drafted the protocol, and is the guarantor of the review. SK, IZ and  
24  
25 281 FF contributed to study design and drafting the protocol. ELZ, SK, and KW designed and  
26  
27 282 tested the search strategy. FF and IZ tested quality rating tools and software options. All  
28  
29 283 authors read and approved the final protocol.  
30  
31  
32

#### 33 284 **Funding**

34  
35 285 This research received no specific grant from any funding agency in the public, commercial or  
36  
37 286 not-for-profit sectors.  
38  
39  
40

#### 41 287 **Acknowledgments**

42  
43 288 Open access funding provided by University of Vienna.  
44  
45

#### 46 289 **Patient and public involvement**

47  
48 290 This research was done without patient involvement.  
49  
50

#### 51 291 **Competing interests**

52  
53 292 The authors have no competing nor potential conflict interests to declare.  
54  
55

56 293 **Word Count:** 2,548 words.  
57  
58  
59

60 294

295 **REFERENCES**

- 296 1 Schalock RL, Borthwick-Duffy SA, Bradley VJ, *et al.* *Intellectual Disability: Definition,*  
297 *Classification, and Systems of Supports.* 11th ed. Washington, DC: : American Association  
298 on Intellectual and Developmental Disabilities 2010.
- 299 2 American Psychiatric Association. *Diagnostic and statistical manual of mental disorders.*  
300 Washington, DC: : Author 2013.
- 301 3 World Health Organization. *International classification of diseases (11th Revision).* 2018.  
302 <https://icd.who.int/en>
- 303 4 Holt G, Costello H, Bouras H, *et al.* BIOMED-MEROPE project: service provision for  
304 adults with intellectual disability: a European comparison. *J Intellect Disabil Res*  
305 2000;**44**:685–96. doi:10.1046/j.1365-2788.2000.00312.x
- 306 5 Durkin M. The epidemiology of developmental disabilities in low-income countries. *Ment*  
307 *Retard Dev Disabil Res Rev* 2002;**8**:206–11. doi:10.1002/mrdd.10039
- 308 6 Maulik PK, Mascarenhas MN, Mathers CD, *et al.* Prevalence of intellectual disability: a  
309 meta-analysis of population-based studies. *Res Dev Disabil* 2011;**32**:419–36.  
310 doi:10.1016/j.ridd.2010.12.018
- 311 7 Roeleveld N, Zielhuis GA, Gabreëls F. The prevalence of mental retardation: a critical  
312 review of recent literature. *Dev Med Child Neurol* 1997;**39**:125–32. doi:10.1111/j.1469-  
313 8749.1997.tb07395.x
- 314 8 Strydom A, Hassiotis A, King M, *et al.* The relationship of dementia prevalence in older  
315 adults with intellectual disability (ID) to age and severity of ID. *Psychol Med* 2009;**39**:13–  
316 21. doi:10.1017/S0033291708003334
- 317 9 Strydom A, Chan T, King M, *et al.* Incidence of dementia in older adults with intellectual  
318 disabilities. *Res Dev Disabil* 2013;**34**:1881–1885. doi:10.1016/j.ridd.2013.02.021
- 319 10 Takenoshita S, Terada S, Kuwano R, *et al.* Prevalence of dementia in people with  
320 intellectual disabilities: cross-sectional study. *Int J Geriatr Psychiatry* 2020;**35**:414–22.  
321 doi:10.1002/gps.5258
- 322 11 Folstein MF, Folstein SE, McHugh PR. “Mini-mental state”: a practical method for  
323 grading the cognitive state of patients for the clinician. *J Psychiatr Res* 1975;**12**:189–98.  
324 doi:10.1016/0022-3956(75)90026-6
- 325 12 Burt DB. Issues in dementia assessment methods. In: Prasher VP, ed.  
326 *Neuropsychological Assessment of Dementia in Down Syndrome and Intellectual*  
327 *Disabilities.* Cham, Switzerland: : Springer 2018.
- 328 13 Zeilinger EL, Stiehl KA, Weber G. A systematic review on assessment instruments for  
329 dementia in persons with intellectual disabilities. *Res Dev Disabil* 2013;**34**:3962–3977.  
330 doi:10.1016/j.ridd.2013.08.013

- 1  
2  
3 331 14 Jopp DA, Keys CB. Diagnostic Overshadowing Reviewed and Reconsidered. *Am J*  
4 332 *Ment Retard* 2001;**106**:416–33. doi:10.1352/0895-  
5 333 8017(2001)106<0416:DORAR>2.0.CO;2
- 6  
7  
8 334 15 Mason J, Scior K. ‘Diagnostic Overshadowing’ Amongst Clinicians Working with  
9 335 People with Intellectual Disabilities in the UK. *J Appl Res Intellect Disabil* 2004;**17**:85–90.  
10 336 doi:10.1111/j.1360-2322.2004.00184.x
- 11  
12 337 16 Hartley D, Blumenthal T, Carrillo M, *et al.* Down syndrome and Alzheimer’s disease:  
13 338 Common pathways, common goals. *Alzheimers Dement J Alzheimers Assoc* 2015;**11**:700–  
14 339 9. doi:10.1016/j.jalz.2014.10.007
- 15  
16 340 17 Lautarescu BA, Holland AJ, Zaman SH. The Early Presentation of Dementia in People  
17 341 with Down Syndrome: a Systematic Review of Longitudinal Studies. *Neuropsychol Rev*  
18 342 2017;**1**:31–45. doi:10.1007/s11065-017-9341-9
- 19  
20 343 18 Aylward EH, Burt DB, Thorpe LU, *et al.* Diagnosis of dementia in individuals with  
21 344 intellectual disability. *J Intellect Disabil Res* 1997;**41**:152–64. doi:10.1111/j.1365-  
22 345 2788.1997.tb00692.x
- 23  
24 346 19 Deb S, McHugh R. Dementia among Persons with Down Syndrome. In: Urbano RC,  
25 347 ed. *International Review of Research in Mental Retardation*. Academic Press 2010. 221–  
26 348 55. doi:10.1016/S0074-7750(10)39008-2
- 27  
28 349 20 Kalsy S, Oliver C. The Assessment of Dementia in People with Intellectual  
29 350 Disabilities: Key Assessment Instruments. In: *Assessing Adults with Intellectual*  
30 351 *Disabilities*. John Wiley & Sons, Ltd 2008. 207–19. doi:10.1002/9780470773697.ch15
- 31  
32 352 21 Heller T, Scott HM, Janicki MP. Caregiving, intellectual disability, and dementia:  
33 353 Report of the Summit Workgroup on Caregiving and Intellectual and Developmental  
34 354 Disabilities. *Alzheimers Dement Transl Res Clin Interv* 2018;**4**:272–282.  
35 355 doi:10.1016/j.trci.2018.06.002
- 36  
37 356 22 Robinson L, Tang E, Taylor JP. Dementia: timely diagnosis and early intervention.  
38 357 *BMJ* 2015;**350**:3029. doi:10.1136/bmj.h3029
- 39  
40 358 23 Summers A, MacDonald S. Psychosocial interventions for people with intellectual  
41 359 disabilities and dementia: A systematic review. *J Appl Res Intellect Disabil* 2020;:1–17.
- 42  
43 360 24 United Nations. *Convention on the Rights of Persons with Disabilities*. New York: :  
44 361 United Nations 2006.
- 45  
46 362 25 McKenzie K, Metcalfe D, Murray G. A review of measures used in the screening,  
47 363 assessment and diagnosis of dementia in people with an intellectual disability. *Rev J Appl*  
48 364 *Res Intellect Disabil* 2018;**31**:725–742. doi:10.1111/jar.12441
- 49  
50 365 26 Walton MK, Powers JH, Hobart J, *et al.* Clinical Outcome Assessments: Conceptual  
51 366 Foundation—Report of the ISPOR Clinical Outcomes Assessment – Emerging Good  
52 367 Practices for Outcomes Research Task Force. *Value Health* 2015;**18**:741–52.  
53 368 doi:10.1016/j.jval.2015.08.006
- 54  
55 369 27 Elliott-King J, Shaw S, Bandelow S, *et al.* A critical literature review of the  
56 370 effectiveness of various instruments in the diagnosis of dementia in adults with intellectual

- 1  
2  
3 371 disabilities. *Alzheimers Dement Diagn Assess Dis Monit* 2016;**4**:126–48.  
4 372 doi:10.1016/j.dadm.2016.06.002  
5  
6 373 28 Sabbagh M, Edgin J. Clinical assessment of cognitive decline in adults with Down  
7 374 syndrome. *Curr Alzheimer Res* 2016;**13**:30–4. doi:10.2174/1567205012666150921095724  
8  
9 375 29 Moher D, Liberati A, Tetzlaff J, *et al.* Preferred Reporting Items for Systematic  
10 376 Reviews and Meta-Analyses: The PRISMA Statement. *Ann Intern Med* 2009;**151**:264.  
11 377 doi:10.7326/0003-4819-151-4-200908180-00135  
12  
13  
14 378 30 Moher D, Shamseer L, Clarke M, *et al.* Preferred reporting items for systematic  
15 379 review and meta-analysis protocols (PRISMA-P) 2015 statement. *Syst Rev* 2015;**4**:1.  
16 380 doi:10.1186/2046-4053-4-1  
17  
18 381 31 Shamseer L, Moher D, Clarke M, *et al.* Preferred reporting items for systematic  
19 382 review and meta-analysis protocols (PRISMA-P) 2015: elaboration and explanation. *BMJ*  
20 383 2015;**349**. doi:10.1136/bmj.g7647  
21  
22  
23 384 32 Prinsen CAC, Mokkink LB, Bouter LM, *et al.* COSMIN guideline for systematic  
24 385 reviews of patient-reported outcome measures. *Qual Life Res* 2018;**27**:1147–57.  
25 386 doi:10.1007/s11136-018-1798-3  
26  
27 387 33 Zeilinger EL, Nader IW, Brehmer-Rinderer B, *et al.* CAPs-IDD: Characteristics of  
28 388 Assessment Instruments for Psychiatric Disorders in Persons with Intellectual  
29 389 Developmental Disorders. *J Intellect Disabil Res* 2013;**57**:737–46. doi:10.1111/jir.12003  
30  
31  
32 390 34 Moss S, Patel P, Prosser H, *et al.* Psychiatric Morbidity in Older People with  
33 391 Moderate and Severe Learning Disability: I: Development and Reliability of the Patient  
34 392 Interview (PAS-ADD). *Br J Psychiatry* 1993;**163**:471–80. doi:10.1192/bjp.163.4.471  
35  
36 393 35 Mokkink LB, Prinsen C, Patrick DL, *et al.* *COSMIN methodology for systematic*  
37 394 *reviews of patient-reported outcome measures (PROMs) - user manual*. Amsterdam, The  
38 395 Netherlands: : VU University Medical Center 2018.  
39  
40  
41 396 36 Terwee CB, Prinsen CA, Chiarotto A, *et al.* *COSMIN methodology for assessing the*  
42 397 *content validity of PROMs – user manual*. Amsterdam, The Netherlands: : VU University  
43 398 Medical Center 2018.  
44  
45 399 37 Mokkink LB, de Vet HCW, Prinsen CAC, *et al.* COSMIN Risk of Bias checklist for  
46 400 systematic reviews of Patient-Reported Outcome Measures. *Qual Life Res* 2018;**27**:1171–  
47 401 9. doi:10.1007/s11136-017-1765-4  
48  
49  
50 402 38 R Core Team. *R: A Language and Environment for Statistical Computing*. Vienna,  
51 403 Austria: : R Foundation for Statistical Computing 2020. <https://www.R-project.org/>  
52  
53 404  
54  
55 405  
56  
57 406  
58  
59  
60 407

1  
2  
3 408 **Figure legends**  
4  
5

6 409 Figure 1: PRISMA flow chart of first search  
7  
8

9 410 Figure 2: PRISMA flow chart of second search  
10  
11  
12  
13  
14  
15  
16  
17  
18  
19  
20  
21  
22  
23  
24  
25  
26  
27  
28  
29  
30  
31  
32  
33  
34  
35  
36  
37  
38  
39  
40  
41  
42  
43  
44  
45  
46  
47  
48  
49  
50  
51  
52  
53  
54  
55  
56  
57  
58  
59  
60

For peer review only

1  
2  
3  
4  
5  
6  
7  
8  
9  
10  
11  
12  
13  
14  
15  
16  
17  
18  
19  
20  
21  
22  
23  
24  
25  
26  
27  
28  
29  
30  
31  
32  
33  
34  
35  
36  
37  
38  
39  
40  
41  
42  
43  
44  
45  
46  
47  
48  
49  
50  
51  
52  
53  
54  
55  
56  
57  
58  
59  
60







## Supplementary information

### Informant-based assessment instruments for dementia and their measurement properties in persons with intellectual disability: a systematic review protocol

Detailed search strategy in electronic databases

#### ASSIA

(via ProQuest)

noft(Assess\* OR diagnosti\* OR screen OR screening\* OR instrument\* OR tool\* OR measure\* OR questionnaire\* OR psychometr\* OR scale\* OR interview\*) AND noft(Dement\* OR Alzheimer\*) AND noft(((intellectual\* OR learning) AND disab\*) OR (intellectual\* AND developmental\* AND disorder\*) OR trisom\* 21 OR (down\* AND syndrom\*))

Additional limits: Date: From 2012 to 2020

#### CINAHL

(via EBSCOhost) (MEDLINE records excluded, since they are already in the MEDLINE Search):

(AB ( Assess\* OR diagnosti\* OR screen OR screening\* OR instrument\* OR tool\* OR measure\* OR questionnaire\* OR psychometr\* OR scale\* OR interview\* ) AND AB ( Dement\* OR Alzheimer\* ) AND AB ( ((intellectual\* OR learning) AND disab\*) OR (intellectual\* AND developmental\* AND disorder\*) OR trisom\* 21 OR (down\* AND syndrom\*) ) ) OR (TI ( Assess\* OR diagnosti\* OR screen OR screening\* OR instrument\* OR tool\* OR measure\* OR questionnaire\* OR psychometr\* OR scale\* OR interview\* ) AND TI ( Dement\* OR Alzheimer\* ) AND TI ( ((intellectual\* OR learning) AND disab\*) OR (intellectual\* AND developmental\* AND disorder\*) OR trisom\* 21 OR (down\* AND syndrom\*) ) ) OR (SU ( Assess\* OR diagnosti\* OR screen OR screening\* OR instrument\* OR tool\* OR measure\* OR questionnaire\* OR psychometr\* OR scale\* OR interview\* ) AND SU ( Dement\* OR Alzheimer\* ) AND SU ( ((intellectual\* OR learning) AND disab\*) OR (intellectual\* AND developmental\* AND disorder\*) OR trisom\* 21 OR (down\* AND syndrom\*) ) ) )

**Limiters** - Published Date: 20120101-20201231; Exclude MEDLINE records

#### Cochrane Library

(Assess\* OR diagnosti\* OR screen OR screening\* OR instrument\* OR tool\* OR measure\* OR questionnaire\* OR psychometr\* OR scale\* OR interview\*):ti,ab,kw AND (Dement\* OR Alzheimer\*):ti,ab,kw AND (((intellectual\* OR learning) AND disab\*) OR (intellectual\* AND developmental\* AND disorder\*) OR trisom\* 21 OR (down\* AND syndrom\*)):ti,ab,kw

with Cochrane Library publication date from Jan 2012 to Dec 2020

**ERIC, MEDLINE, and PsycInfo**

(via Ovid) [mp=ab, ti, hw, id, tc, ot, tm, mh]

((Assess\* or diagnosti\* or screen or screening\* or instrument\* or tool\* or measure\* or questionnaire\* or psychometr\* or scale\* or interview\*) and (Dement\* or Alzheimer\*) and (((intellectual\* or learning) and disab\*) or (intellectual\* and developmental\* and disorder\*) or trisom\* 21 or (down\* and syndrom\*))).mp

limit to yr="2012 - 2020"

**SCOPUS**

TITLE-ABS-KEY ( ( assess\* OR diagnosti\* OR screen OR screening\* OR instrument\* OR tool\* OR measure\* OR questionnaire\* OR psychometr\* OR scale\* OR interview\* ) AND ( dement\* OR alzheimer\* ) AND ( ( ( intellectual\* OR learning ) AND disab\* ) OR ( intellectual\* AND developmental\* AND disorder\* ) OR trisom\* 21 OR ( down\* AND syndrom\* ) ) ) AND PUBYEAR > 2011

**Web of Science Core Collection:**

**TOPIC:**(Assess\* OR diagnosti\* OR screen OR screening\* OR instrument\* OR tool\* OR measure\* OR questionnaire\* OR psychometr\* OR scale\* OR interview\*) AND

**TOPIC:**(Dement\* OR Alzheimer\*) AND

**TOPIC:**((intellectual\* OR learning) AND disab\*) OR (intellectual\* AND developmental\* AND disorder\*) OR trisom\* 21 OR (down\* AND syndrom\*)

**Timespan:** 2012-2020. **Indexes:** SCI-EXPANDED, SSCI, A&HCI, CPCI-S, CPCI-SSH, BKCI-S, BKCI-SSH, ESCI, CCR-EXPANDED, IC.

**OpenGrey**

(Assess\* OR diagnosti\* OR screen OR screening\* OR instrument\* OR tool\* OR measure\* OR questionnaire\* OR psychometr\* OR scale\* OR interview\*) AND

(Dement\* OR Alzheimer\*) AND

((intellectual\* OR learning) AND disab\*) OR (intellectual\* AND developmental\* AND disorder\*) OR trisom\* 21 OR (down\* AND syndrom\*)

**ProQuest Dissertations & Theses**

noft(Assess\* OR diagnosti\* OR screen OR screening\* OR instrument\* OR tool\* OR measure\* OR questionnaire\* OR psychometr\* OR scale\* OR interview\*) AND

noft(Dement\* OR Alzheimer\*) AND noft(((intellectual\* OR learning) AND disab\*) OR (intellectual\* AND developmental\* AND disorder\*) OR trisom\* 21 OR (down\* AND syndrom\*))

Additional limits: Date: From 2012 to 2020

# Reporting checklist for protocol of a systematic review.

Based on the PRISMA-P guidelines.

## Instructions to authors

Complete this checklist by entering the page numbers from your manuscript where readers will find each of the items listed below.

Your article may not currently address all the items on the checklist. Please modify your text to include the missing information. If you are certain that an item does not apply, please write "n/a" and provide a short explanation.

Upload your completed checklist as an extra file when you submit to a journal.

In your methods section, say that you used the PRISMA-Reporting guidelines, and cite them as:

Moher D, Shamseer L, Clarke M, Ghersi D, Liberati A, Petticrew M, Shekelle P, Stewart LA. Preferred Reporting Items for Systematic Review and Meta-Analysis Protocols (PRISMA-P) 2015 statement. Syst Rev. 2015;4(1):1.

|                |                     |                                                          | Page   | Line   |
|----------------|---------------------|----------------------------------------------------------|--------|--------|
|                |                     | Reporting Item                                           | Number | Number |
| <b>Title</b>   |                     |                                                          |        |        |
| Identification | <a href="#">#1a</a> | Identify the report as a protocol of a systematic review | 1      | 2-3    |

|    |                     |                     |                                                 |      |         |
|----|---------------------|---------------------|-------------------------------------------------|------|---------|
| 1  | Update              | <a href="#">#1b</a> | If the protocol is for an update of a previous  | n.a. |         |
| 2  |                     |                     | systematic review, identify as such             |      |         |
| 3  |                     |                     |                                                 |      |         |
| 4  |                     |                     |                                                 |      |         |
| 5  |                     |                     |                                                 |      |         |
| 6  | <b>Registration</b> |                     |                                                 |      |         |
| 7  |                     |                     |                                                 |      |         |
| 8  |                     |                     |                                                 |      |         |
| 9  |                     |                     |                                                 |      |         |
| 10 |                     | <a href="#">#2</a>  | If registered, provide the name of the registry | 6    | 141-142 |
| 11 |                     |                     | (such as PROSPERO) and registration             |      |         |
| 12 |                     |                     | number                                          |      |         |
| 13 |                     |                     |                                                 |      |         |
| 14 |                     |                     |                                                 |      |         |
| 15 |                     |                     |                                                 |      |         |
| 16 |                     |                     |                                                 |      |         |
| 17 | <b>Authors</b>      |                     |                                                 |      |         |
| 18 |                     |                     |                                                 |      |         |
| 19 |                     |                     |                                                 |      |         |
| 20 | Contact             | <a href="#">#3a</a> | Provide name, institutional affiliation, e-mail | 1    | 5-20    |
| 21 |                     |                     | address of all protocol authors; provide        |      |         |
| 22 |                     |                     | physical mailing address of corresponding       |      |         |
| 23 |                     |                     | author                                          |      |         |
| 24 |                     |                     |                                                 |      |         |
| 25 |                     |                     |                                                 |      |         |
| 26 |                     |                     |                                                 |      |         |
| 27 |                     |                     |                                                 |      |         |
| 28 |                     |                     |                                                 |      |         |
| 29 |                     |                     |                                                 |      |         |
| 30 | Contribution        | <a href="#">#3b</a> | Describe contributions of protocol authors and  | 13   | 279-283 |
| 31 |                     |                     | identify the guarantor of the review            |      |         |
| 32 |                     |                     |                                                 |      |         |
| 33 |                     |                     |                                                 |      |         |
| 34 |                     |                     |                                                 |      |         |
| 35 | <b>Amendments</b>   |                     |                                                 |      |         |
| 36 |                     |                     |                                                 |      |         |
| 37 |                     |                     |                                                 |      |         |
| 38 |                     |                     |                                                 |      |         |
| 39 |                     | <a href="#">#4</a>  | If the protocol represents an amendment of a    | 6    | 142-144 |
| 40 |                     |                     | previously completed or published protocol,     |      |         |
| 41 |                     |                     | identify as such and list changes; otherwise,   |      |         |
| 42 |                     |                     | state plan for documenting important protocol   |      |         |
| 43 |                     |                     | amendments                                      |      |         |
| 44 |                     |                     |                                                 |      |         |
| 45 |                     |                     |                                                 |      |         |
| 46 |                     |                     |                                                 |      |         |
| 47 |                     |                     |                                                 |      |         |
| 48 |                     |                     |                                                 |      |         |
| 49 |                     |                     |                                                 |      |         |
| 50 |                     |                     |                                                 |      |         |
| 51 | <b>Support</b>      |                     |                                                 |      |         |
| 52 |                     |                     |                                                 |      |         |
| 53 |                     |                     |                                                 |      |         |
| 54 | Sources             | <a href="#">#5a</a> | Indicate sources of financial or other support  | 13   | 284-286 |
| 55 |                     |                     | for the review                                  |      |         |
| 56 |                     |                     |                                                 |      |         |
| 57 |                     |                     |                                                 |      |         |
| 58 |                     |                     |                                                 |      |         |
| 59 |                     |                     |                                                 |      |         |
| 60 |                     |                     |                                                 |      |         |

|    |                      |                     |                                                    |        |          |
|----|----------------------|---------------------|----------------------------------------------------|--------|----------|
| 1  | Sponsor              | <a href="#">#5b</a> | Provide name for the review funder and / or        | n.a.   |          |
| 2  |                      |                     | sponsor                                            |        |          |
| 3  |                      |                     |                                                    |        |          |
| 4  |                      |                     |                                                    |        |          |
| 5  |                      |                     |                                                    |        |          |
| 6  | Role of sponsor      | <a href="#">#5c</a> | Describe roles of funder(s), sponsor(s), and /     | n.a.   |          |
| 7  |                      |                     | or institution(s), if any, in developing the       |        |          |
| 8  | or funder            |                     | protocol                                           |        |          |
| 9  |                      |                     |                                                    |        |          |
| 10 |                      |                     |                                                    |        |          |
| 11 |                      |                     |                                                    |        |          |
| 12 |                      |                     |                                                    |        |          |
| 13 |                      |                     |                                                    |        |          |
| 14 | <b>Introduction</b>  |                     |                                                    |        |          |
| 15 |                      |                     |                                                    |        |          |
| 16 |                      |                     |                                                    |        |          |
| 17 | Rationale            | <a href="#">#6</a>  | Describe the rationale for the review in the       | 5-6    | 105-122  |
| 18 |                      |                     | context of what is already known                   |        |          |
| 19 |                      |                     |                                                    |        |          |
| 20 |                      |                     |                                                    |        |          |
| 21 |                      |                     |                                                    |        |          |
| 22 | Objectives           | <a href="#">#7</a>  | Provide an explicit statement of the               | 6      | 126-131  |
| 23 |                      |                     | question(s) the review will address with           |        |          |
| 24 |                      |                     | reference to participants, interventions,          |        |          |
| 25 |                      |                     | comparators, and outcomes (PICO)                   |        |          |
| 26 |                      |                     |                                                    |        |          |
| 27 |                      |                     |                                                    |        |          |
| 28 |                      |                     |                                                    |        |          |
| 29 |                      |                     |                                                    |        |          |
| 30 |                      |                     |                                                    |        |          |
| 31 |                      |                     |                                                    |        |          |
| 32 | <b>Methods</b>       |                     |                                                    |        |          |
| 33 |                      |                     |                                                    |        |          |
| 34 |                      |                     |                                                    |        |          |
| 35 | Eligibility criteria | <a href="#">#8</a>  | Specify the study characteristics (such as         | 7-8, 9 | 157-172, |
| 36 |                      |                     | PICO, study design, setting, time frame) and       |        | 180-188  |
| 37 |                      |                     | report characteristics (such as years              |        |          |
| 38 |                      |                     | considered, language, publication status) to       |        |          |
| 39 |                      |                     | be used as criteria for eligibility for the review |        |          |
| 40 |                      |                     |                                                    |        |          |
| 41 |                      |                     |                                                    |        |          |
| 42 |                      |                     |                                                    |        |          |
| 43 |                      |                     |                                                    |        |          |
| 44 |                      |                     |                                                    |        |          |
| 45 |                      |                     |                                                    |        |          |
| 46 |                      |                     |                                                    |        |          |
| 47 |                      |                     |                                                    |        |          |
| 48 | Information          | <a href="#">#9</a>  | Describe all intended information sources          | 7, 9   | 152-154, |
| 49 |                      |                     | (such as electronic databases, contact with        |        | 178-181, |
| 50 | sources              |                     | study authors, trial registers or other grey       |        | 189-194  |
| 51 |                      |                     | literature sources) with planned dates of          |        |          |
| 52 |                      |                     | coverage                                           |        |          |
| 53 |                      |                     |                                                    |        |          |
| 54 |                      |                     |                                                    |        |          |
| 55 |                      |                     |                                                    |        |          |
| 56 |                      |                     |                                                    |        |          |
| 57 |                      |                     |                                                    |        |          |
| 58 |                      |                     |                                                    |        |          |
| 59 |                      |                     |                                                    |        |          |
| 60 |                      |                     |                                                    |        |          |

|    |                 |                      |                                                   |            |         |
|----|-----------------|----------------------|---------------------------------------------------|------------|---------|
| 1  | Search strategy | <a href="#">#10</a>  | Present draft of search strategy to be used for   | 8;         | 164-165 |
| 2  |                 |                      |                                                   |            |         |
| 3  |                 |                      |                                                   |            |         |
| 4  |                 |                      | at least one electronic database, including       | supplement |         |
| 5  |                 |                      |                                                   |            |         |
| 6  |                 |                      | planned limits, such that it could be repeated    |            |         |
| 7  |                 |                      |                                                   |            |         |
| 8  |                 |                      |                                                   |            |         |
| 9  | Study records - | <a href="#">#11a</a> | Describe the mechanism(s) that will be used       | 12         | 254-257 |
| 10 |                 |                      |                                                   |            |         |
| 11 | data            |                      | to manage records and data throughout the         |            |         |
| 12 |                 |                      |                                                   |            |         |
| 13 | management      |                      | review                                            |            |         |
| 14 |                 |                      |                                                   |            |         |
| 15 |                 |                      |                                                   |            |         |
| 16 | Study records - | <a href="#">#11b</a> | State the process that will be used for           | 9          | 195-198 |
| 17 |                 |                      |                                                   |            |         |
| 18 | selection       |                      | selecting studies (such as two independent        |            |         |
| 19 |                 |                      |                                                   |            |         |
| 20 | process         |                      | reviewers) through each phase of the review       |            |         |
| 21 |                 |                      |                                                   |            |         |
| 22 |                 |                      | (that is, screening, eligibility and inclusion in |            |         |
| 23 |                 |                      |                                                   |            |         |
| 24 |                 |                      | meta-analysis)                                    |            |         |
| 25 |                 |                      |                                                   |            |         |
| 26 |                 |                      |                                                   |            |         |
| 27 |                 |                      |                                                   |            |         |
| 28 | Study records - | <a href="#">#11c</a> | Describe planned method of extracting data        | 10         | 207-211 |
| 29 |                 |                      |                                                   |            |         |
| 30 | data collection |                      | from reports (such as piloting forms, done        |            |         |
| 31 |                 |                      |                                                   |            |         |
| 32 | process         |                      | independently, in duplicate), any processes       |            |         |
| 33 |                 |                      |                                                   |            |         |
| 34 |                 |                      | for obtaining and confirming data from            |            |         |
| 35 |                 |                      |                                                   |            |         |
| 36 |                 |                      | investigators                                     |            |         |
| 37 |                 |                      |                                                   |            |         |
| 38 |                 |                      |                                                   |            |         |
| 39 |                 |                      |                                                   |            |         |
| 40 | Data items      | <a href="#">#12</a>  | List and define all variables for which data will | 9-10       | 199-206 |
| 41 |                 |                      |                                                   |            |         |
| 42 |                 |                      | be sought (such as PICO items, funding            |            |         |
| 43 |                 |                      |                                                   |            |         |
| 44 |                 |                      | sources), any pre-planned data assumptions        |            |         |
| 45 |                 |                      |                                                   |            |         |
| 46 |                 |                      | and simplifications                               |            |         |
| 47 |                 |                      |                                                   |            |         |
| 48 |                 |                      |                                                   |            |         |
| 49 |                 |                      |                                                   |            |         |
| 50 | Outcomes and    | <a href="#">#13</a>  | List and define all outcomes for which data will  | n.a.       |         |
| 51 |                 |                      |                                                   |            |         |
| 52 | prioritization  |                      | be sought, including prioritization of main and   |            |         |
| 53 |                 |                      |                                                   |            |         |
| 54 |                 |                      | additional outcomes, with rationale               |            |         |
| 55 |                 |                      |                                                   |            |         |
| 56 |                 |                      |                                                   |            |         |
| 57 |                 |                      |                                                   |            |         |
| 58 |                 |                      |                                                   |            |         |
| 59 |                 |                      |                                                   |            |         |
| 60 |                 |                      |                                                   |            |         |

|    |                 |                      |                                                          |       |         |
|----|-----------------|----------------------|----------------------------------------------------------|-------|---------|
| 1  | Risk of bias in | <a href="#">#14</a>  | Describe anticipated methods for assessing               | 10-11 | 212-231 |
| 2  |                 |                      |                                                          |       |         |
| 3  | individual      |                      | risk of bias of individual studies, including            |       |         |
| 4  |                 |                      |                                                          |       |         |
| 5  | studies         |                      | whether this will be done at the outcome or              |       |         |
| 6  |                 |                      |                                                          |       |         |
| 7  |                 |                      | study level, or both; state how this information         |       |         |
| 8  |                 |                      |                                                          |       |         |
| 9  |                 |                      | will be used in data synthesis                           |       |         |
| 10 |                 |                      |                                                          |       |         |
| 11 |                 |                      |                                                          |       |         |
| 12 |                 |                      |                                                          |       |         |
| 13 | Data synthesis  | <a href="#">#15a</a> | Describe criteria under which study data will            | 11    | 235-240 |
| 14 |                 |                      |                                                          |       |         |
| 15 |                 |                      | be quantitatively synthesised                            |       |         |
| 16 |                 |                      |                                                          |       |         |
| 17 |                 |                      |                                                          |       |         |
| 18 | Data synthesis  | <a href="#">#15b</a> | If data are appropriate for quantitative                 | n.a.  |         |
| 19 |                 |                      |                                                          |       |         |
| 20 |                 |                      | synthesis, describe planned summary                      |       |         |
| 21 |                 |                      |                                                          |       |         |
| 22 |                 |                      | measures, methods of handling data and                   |       |         |
| 23 |                 |                      |                                                          |       |         |
| 24 |                 |                      | methods of combining data from studies,                  |       |         |
| 25 |                 |                      |                                                          |       |         |
| 26 |                 |                      | including any planned exploration of                     |       |         |
| 27 |                 |                      |                                                          |       |         |
| 28 |                 |                      | consistency (such as I <sup>2</sup> , Kendall's $\tau$ ) |       |         |
| 29 |                 |                      |                                                          |       |         |
| 30 |                 |                      |                                                          |       |         |
| 31 |                 |                      |                                                          |       |         |
| 32 |                 |                      |                                                          |       |         |
| 33 | Data synthesis  | <a href="#">#15c</a> | Describe any proposed additional analyses                | n.a.  |         |
| 34 |                 |                      |                                                          |       |         |
| 35 |                 |                      | (such as sensitivity or subgroup analyses,               |       |         |
| 36 |                 |                      |                                                          |       |         |
| 37 |                 |                      | meta-regression)                                         |       |         |
| 38 |                 |                      |                                                          |       |         |
| 39 |                 |                      |                                                          |       |         |
| 40 |                 |                      |                                                          |       |         |
| 41 | Data synthesis  | <a href="#">#15d</a> | If quantitative synthesis is not appropriate,            | 11    | 232-235 |
| 42 |                 |                      |                                                          |       |         |
| 43 |                 |                      | describe the type of summary planned                     |       |         |
| 44 |                 |                      |                                                          |       |         |
| 45 |                 |                      |                                                          |       |         |
| 46 | Meta-bias(es)   | <a href="#">#16</a>  | Specify any planned assessment of meta-                  | 11    | 227-231 |
| 47 |                 |                      |                                                          |       |         |
| 48 |                 |                      | bias(es) (such as publication bias across                |       |         |
| 49 |                 |                      |                                                          |       |         |
| 50 |                 |                      | studies, selective reporting within studies)             |       |         |
| 51 |                 |                      |                                                          |       |         |
| 52 |                 |                      |                                                          |       |         |
| 53 |                 |                      |                                                          |       |         |
| 54 |                 |                      |                                                          |       |         |
| 55 |                 |                      |                                                          |       |         |
| 56 |                 |                      |                                                          |       |         |
| 57 |                 |                      |                                                          |       |         |
| 58 |                 |                      |                                                          |       |         |
| 59 |                 |                      |                                                          |       |         |
| 60 |                 |                      |                                                          |       |         |

1 Confidence in [#17](#) Describe how the strength of the body of 12 251-253  
2  
3 cumulative evidence will be assessed (such as GRADE)  
4  
5 evidence  
6  
7

8  
9 None The PRISMA-P checklist is distributed under the terms of the Creative Commons Attribution  
10 License CC-BY 4.0. This checklist can be completed online using <https://www.goodreports.org/>, a tool  
11  
12 made by the [EQUATOR Network](#) in collaboration with [Penelope.ai](#)  
13  
14  
15  
16  
17  
18  
19  
20  
21  
22  
23  
24  
25  
26  
27  
28  
29  
30  
31  
32  
33  
34  
35  
36  
37  
38  
39  
40  
41  
42  
43  
44  
45  
46  
47  
48  
49  
50  
51  
52  
53  
54  
55  
56  
57  
58  
59  
60



# BMJ Open

## Informant-based assessment instruments for dementia and their measurement properties in persons with intellectual disability: a systematic review protocol

|                                 |                                                                                                                                                                                                                                                                                      |
|---------------------------------|--------------------------------------------------------------------------------------------------------------------------------------------------------------------------------------------------------------------------------------------------------------------------------------|
| Journal:                        | <i>BMJ Open</i>                                                                                                                                                                                                                                                                      |
| Manuscript ID                   | bmjopen-2020-040920.R2                                                                                                                                                                                                                                                               |
| Article Type:                   | Protocol                                                                                                                                                                                                                                                                             |
| Date Submitted by the Author:   | 18-Nov-2020                                                                                                                                                                                                                                                                          |
| Complete List of Authors:       | Zeilinger, Elisabeth; Universitat Wien, Faculty of Psychology<br>Komenda, Sophie; Universität Wien, Faculty of Psychology<br>Zrnic, Irina; Universität Wien, Faculty of Psychology<br>Franken, Fabian; independent<br>Woditschka, Katharina; Universität Wien, Faculty of Psychology |
| <b>Primary Subject Heading</b>: | Research methods                                                                                                                                                                                                                                                                     |
| Secondary Subject Heading:      | Mental health, Research methods                                                                                                                                                                                                                                                      |
| Keywords:                       | MENTAL HEALTH, Old age psychiatry < PSYCHIATRY, STATISTICS & RESEARCH METHODS, Dementia < NEUROLOGY                                                                                                                                                                                  |
|                                 |                                                                                                                                                                                                                                                                                      |

SCHOLARONE™  
Manuscripts



I, the Submitting Author has the right to grant and does grant on behalf of all authors of the Work (as defined in the below author licence), an exclusive licence and/or a non-exclusive licence for contributions from authors who are: i) UK Crown employees; ii) where BMJ has agreed a CC-BY licence shall apply, and/or iii) in accordance with the terms applicable for US Federal Government officers or employees acting as part of their official duties; on a worldwide, perpetual, irrevocable, royalty-free basis to BMJ Publishing Group Ltd ("BMJ") its licensees and where the relevant Journal is co-owned by BMJ to the co-owners of the Journal, to publish the Work in this journal and any other BMJ products and to exploit all rights, as set out in our [licence](#).

The Submitting Author accepts and understands that any supply made under these terms is made by BMJ to the Submitting Author unless you are acting as an employee on behalf of your employer or a postgraduate student of an affiliated institution which is paying any applicable article publishing charge ("APC") for Open Access articles. Where the Submitting Author wishes to make the Work available on an Open Access basis (and intends to pay the relevant APC), the terms of reuse of such Open Access shall be governed by a Creative Commons licence – details of these licences and which [Creative Commons](#) licence will apply to this Work are set out in our licence referred to above.

Other than as permitted in any relevant BMJ Author's Self Archiving Policies, I confirm this Work has not been accepted for publication elsewhere, is not being considered for publication elsewhere and does not duplicate material already published. I confirm all authors consent to publication of this Work and authorise the granting of this licence.

1  
2  
3 1 Title: Informant-based assessment instruments for dementia and their  
4  
5  
6 2 measurement properties in persons with intellectual disability: a systematic  
7  
8  
9 3 review protocol  
10  
11  
12 4

13  
14  
15 5 **Authors and affiliations**

16  
17 6 Elisabeth L. Zeilinger<sup>1\*</sup>: [elisabeth.zeilinger@univie.ac.at](mailto:elisabeth.zeilinger@univie.ac.at)

18  
19 7 Sophie Komenda<sup>1</sup>: [sophie.komenda@univie.ac.at](mailto:sophie.komenda@univie.ac.at)

20  
21 8 Irina Zrnic<sup>1</sup>: [irina.zrnic@univie.ac.at](mailto:irina.zrnic@univie.ac.at)

22  
23 9 Fabian Franken<sup>2</sup>: [fabian.franken@outlook.com](mailto:fabian.franken@outlook.com)

24  
25 10 Katharina Woditschka<sup>2</sup>: [katharina.woditschka@gmail.com](mailto:katharina.woditschka@gmail.com)

26  
27  
28 12 <sup>1</sup> Faculty of Psychology, University of Vienna, Vienna, Austria

29  
30 13 <sup>2</sup> independent

31  
32  
33 14  
34  
35 15 \* Correspondence:

36 16 Elisabeth Zeilinger

37 17 Faculty of Psychology, University of Vienna

38 18 Liebiggasse 5

39 19 A-1010 Vienna

40 20 Austria  
41  
42  
43 21  
44  
45 22  
46  
47

48 23 Word count of main text: 2,566 words  
49  
50  
51 24  
52  
53  
54 25  
55  
56  
57  
58  
59  
60

## 26 **ABSTRACT**

### 27 **Introduction**

28 Persons with intellectual disability (ID) are at a higher risk of developing dementia than  
29 persons without ID, with an expected earlier onset. Assessment methods for the general  
30 population cannot be applied for persons with ID due to their pre-existing intellectual and  
31 functional impairments. As there is no agreed-upon measure to assess dementia in persons  
32 with ID, multiple instruments for this purpose have been developed and adapted in the last  
33 decades. This review aims to identify all available informant-based instruments for the  
34 assessment of dementia in persons with ID, to evaluate and compare them according to their  
35 measurement properties, and to provide a recommendation for the most suitable instrument(s).  
36 Additionally, an overview of the amount and quality of research on these instruments will be  
37 provided.

### 38 **Methods and analysis**

39 This review will be conducted and reported according to the PRISMA statement. We will  
40 adhere to the *COnsensus-based Standards for the selection of health Measurement*  
41 *INstruments* (COSMIN) guidelines, and use a set of characteristics developed for assessment  
42 instruments for persons with ID, the *Characteristics of Assessment Instruments for*  
43 *Psychiatric Disorders in Persons with Intellectual Developmental Disorders* (CAPs-IDD).  
44 Two comprehensive, systematic literature searches will be applied in ten international  
45 databases, including ASSIA, CINAHL, Cochrane Library, ERIC, MEDLINE, PsycINFO,  
46 Scopus, Web of Science, OpenGrey, and ProQuest Dissertations & Theses Global. Risk of  
47 bias and quality assessment will be done according to COSMIN guidelines. We will apply the  
48 modified *Grading of Recommendations, Assessment, Development and Evaluation* (GRADE)  
49 approach to rate the overall quality of the available evidence.

## 50 **Ethics and dissemination**

51 No ethics statement is needed for this study. The results will be submitted to a peer-reviewed  
52 journal, and presented at international conferences.

## 53 **Registration details**

54 PROSPERO registration number: CRD42020181773

## 55 **Keywords**

56 mental health, dementia, old age psychiatry, statistics and research methods

## 58 **ARTICLE SUMMARY**

### 59 **Strengths and limitations of this study**

- 60 • This review follows the most up-to-date standards for conducting systematic reviews  
61 on assessment instruments, the PRISMA and COSMIN guidelines, and additionally  
62 uses the CAPs-IDD, a system especially developed for evaluating assessment  
63 instruments for psychiatric disorders in persons with ID.
- 64 • Two very comprehensive consecutive search strategies will be applied in a total of ten  
65 international databases, including grey and unpublished literature.
- 66 • We use no language restrictions to minimise language bias.
- 67 • We only include informant-based instruments assessing dementia in our evaluation,  
68 and exclude direct cognitive tests.
- 69 • Due to expected heterogeneity in studies, a quantitative pooling of psychometric data  
70 will probably not be possible.

## 73 INTRODUCTION

74 Intellectual disability (ID) is characterized by limitations in intellectual functioning (IQ < 70)  
75 and in adaptive behaviour originating in the developmental phase of an individual.[1] It is also  
76 known as Intellectual Developmental Disorder in the *Diagnostic and Statistical Manual of*  
77 *Mental Disorders 5* (DSM-5)[2] and Disorders of Intellectual Development in the *11th*  
78 *Revision of the International Classification of Diseases* (ICD-11).[3] Prevalence of ID is hard  
79 to establish, since in many countries no official records of persons with ID exist.[4] In large  
80 meta-analysis and reviews, the worldwide prevalence of ID is estimated to range from 1% to  
81 3,3%.[5–7]

82 Persons with ID are at the same or higher risk to develop dementia than persons without  
83 ID.[8–10] Yet, due to their limitations in intellectual functioning, it is often hard to recognize  
84 dementia in this population, especially at an early stage. Well-evaluated assessment and  
85 screening instruments for the general population, such as the frequently used Mini-Mental  
86 State Examination (MMSE)[11] are not suitable for persons with ID due to their pre-existing  
87 disabilities.[12,13] Diagnostic overshadowing[14,15] makes it difficult to distinguish  
88 symptoms linked to the pre-existing disability from symptoms caused by the onset of  
89 dementia. Additionally, the presentation of dementia in persons with ID can differ from the  
90 presentation in persons without ID, with behavioural symptoms and personality changes being  
91 more frequent and probably earlier in the course of the illness, especially in persons with  
92 Down Syndrome.[16,17] To reliably detect dementia in persons with ID, it is recommended to  
93 compare a baseline assessment with periodic re-assessments.[18–20] Most dementia  
94 assessment methods for persons with ID rely on informant-based measures. The respondent of  
95 these instruments should be a person who knows the respective person with ID very well, for  
96 instance, a family member or care staff. In contrast to direct tests of cognitive functioning,

1  
2  
3 97 informant-based instruments can be applied for all persons with ID, irrespective of their  
4  
5 98 intellectual and functional capacity.  
6  
7

8 99 Early recognition of dementia is particularly important to start early interventions, to plan for  
9  
10 100 the future, and to get adequate support for family-carers or care staff.[21–23] Not being able  
11  
12 101 to recognize early signs of dementia constitutes a disadvantage for persons with ID, and  
13  
14 102 contradicts the *Convention on the Rights of Persons with Disabilities by the United Nations*  
15  
16 103 (UN-CRPD).[24] Article 25 and 26 of the UN-CRPD require States Parties to ensure that  
17  
18 104 persons with disabilities can get the “highest attainable standard of health without  
19  
20 105 discrimination on the basis of disability.”[24]  
21  
22  
23  
24

25 106 There are several tools and screening instruments in use for the early recognition of dementia  
26  
27 107 in persons with ID.[13,25] These instruments can be placed into one of three categories:  
28  
29 108 medical test (e.g. fMRI, gene-markers), direct cognitive tests, and informant-based scales,  
30  
31 109 which are also called observer-rated scales. In this review we focus solely on informant-based  
32  
33 110 scales, which include observer-reported outcome measures (ObsROM), as well as clinician-  
34  
35 111 reported outcome measures (ClinROM). [26]  
36  
37  
38  
39

40 112 One systematic review found 114 instruments and four test-batteries that have been used to  
41  
42 113 assess dementia in persons with ID. However, some of these instruments have never been  
43  
44 114 designed or adapted to be used in persons with ID, or even to assess dementia.[13] Although  
45  
46 115 there are already some reviews summarising tools and screening instruments in use for  
47  
48 116 assessing dementia in persons with ID,[13,25,27,28] no systematic review on measurement  
49  
50 117 properties using up-to-date guidelines for review conduction and psychometric evaluation has  
51  
52 118 been conducted so far. We want to provide an inventory of available informant-based  
53  
54 119 instruments and their measurement properties. This should help clinicians and researches in  
55  
56 120 choosing the adequate instrument for their respective purpose. Our review adds to the existing  
57  
58 121 body of knowledge by using a very inclusive systematic search of the literature and, most  
59  
60

1  
2  
3 122 importantly, by providing a systematic evaluation of informant-based dementia assessment  
4  
5 123 instruments following up-to-date guidelines.  
6  
7

8 124 For each instrument, we will systematically summarise the amount and quality of available  
9  
10 125 evaluation studies, depicting which measurement properties have been evaluated to what  
11  
12 126 extent, and which measurement properties have not or insufficiently been evaluated.  
13  
14

15  
16 127 The objectives of this systematic review are to (1) identify informant-based instruments  
17  
18 128 suitable for the assessment of dementia in persons with ID, to (2) provide a systematic  
19  
20 129 overview of descriptive aspects for each instrument (e.g. respondent requirements, response  
21  
22 130 format), to (3) provide a systematic overview of the amount and quality of available research  
23  
24 131 for each instrument and each measurement property, and to (4) provide a recommendation for  
25  
26 132 the most suitable instrument(s) based on all information collected.  
27  
28  
29

### 30 133 **METHODS AND ANALYSIS**

31  
32  
33 134 This review will be conducted and reported according to the *Preferred Reporting Items for*  
34  
35 135 *Systematic Reviews and Meta-Analyses* (PRISMA) statement.[29] The review protocol has  
36  
37 136 been developed using the PRISMA guidelines for protocols (PRISMA-P).[30,31] We will  
38  
39 137 adhere to the *COnsensus-based Standards for the selection of health Measurement*  
40  
41 138 *INstruments* (COSMIN) guidelines,[32] and complement them with a set of characteristics  
42  
43 139 especially developed for assessment instruments for persons with ID, the *Characteristics of*  
44  
45 140 *Assessment Instruments for Psychiatric Disorders in Persons with Intellectual Developmental*  
46  
47 141 *Disorders* (CAPs-IDD).[33] The systematic review has been registered with the *International*  
48  
49 142 *Prospective Register of Systematic Reviews* (PROSPERO) with registration number  
50  
51 143 CRD42020181773. If amendments to the protocol are needed, we will register these in  
52  
53 144 PROSPERO, including date and rationale. In the final publication of our results, any  
54  
55 145 amendments to the protocol will be depicted and explained.  
56  
57  
58  
59  
60



1  
2  
3 **146 Search strategy**  
4

5 147 Two systematic searches will be applied consecutively, and carried out between May 2020  
6  
7 148 and August 2020. The first search should provide an inventory of available informant-based  
8  
9 149 assessment instruments for dementia in persons with ID. The goal of the second search is to  
10  
11 150 locate evaluation studies for each instrument found in the first search. Figure 1 and Figure 2  
12  
13 151 depict our search strategies using PRISMA flow charts.  
14

15  
16  
17 152 **First search**  
18

19  
20 153 To identify instruments we will search in ten international electronic databases, including  
21  
22 154 ASSIA, CINAHL, Cochrane Library, ERIC, MEDLINE, PsycINFO, Scopus, Web of Science,  
23  
24 155 OpenGrey, and ProQuest Dissertations & Theses Global. The search strategy is described in  
25  
26 156 Table 1 and depicted in detail in the supplementary file. It will include various terms for the  
27  
28 157 (1) output of interest, (2) construct of interest, and (3) the specified population. As persons  
29  
30 158 with Down Syndrome are very prone to develop dementia, this subgroup of persons with ID is  
31  
32 159 included in our search strategy. We will use a limit on the timespan of publication in the first  
33  
34 160 search, not including publications before the year 2012. Instruments published up to the year  
35  
36 161 of 2012 are summarised in a previous systematic review.[13] This review used a very  
37  
38 162 inclusive search strategy and listed all assessment instruments that have been used to assess  
39  
40 163 dementia in persons with ID. We will examine the total of 114 dementia assessment  
41  
42 164 instruments listed in the review of 2013, and include those instruments that are in line with  
43  
44 165 our inclusion criteria.  
45  
46  
47  
48  
49

50 166 **Table 1: Search strategy for the first search**  
51

|              | 1: Output              | 2: Construct | 3: Population           |
|--------------|------------------------|--------------|-------------------------|
| Search terms | Assessment instruments | Dementia     | Intellectual disability |

|                                                                                  |                                           |                                                                                                                                                                                                                                                                                                                                                                                     |                                  |                                                                                                                                                      |
|----------------------------------------------------------------------------------|-------------------------------------------|-------------------------------------------------------------------------------------------------------------------------------------------------------------------------------------------------------------------------------------------------------------------------------------------------------------------------------------------------------------------------------------|----------------------------------|------------------------------------------------------------------------------------------------------------------------------------------------------|
| 1<br>2<br>3<br>4<br>5<br>6<br>7<br>8<br>9<br>10<br>11<br>12<br>13<br>14<br>15    | Synonyms                                  | assessment; diagnostic;<br>diagnosis; screening;<br>instrument; tool;<br>measurement;<br>questionnaire;<br>psychometrics; scale;<br>interview                                                                                                                                                                                                                                       | dementia; Alzheimer's<br>disease | intellectual disability;<br>learning disability;<br>intellectual<br>developmental disorder;<br>trisomy 21, Down<br>syndrome                          |
| 16<br>17<br>18<br>19<br>20<br>21<br>22<br>23<br>24<br>25<br>26<br>27<br>28<br>29 | Combined<br>and<br>truncated              | assess* OR diagnosti*<br>OR screen OR<br>screening* OR<br>instrument* OR tool*<br>OR measure* OR<br>questionnaire* OR<br>psychometr* OR scale*<br>OR interview*                                                                                                                                                                                                                     | dement* OR<br>Alzheimer*         | ((intellectual* OR<br>learning) AND disab*)<br>OR (intellectual* AND<br>developmental* AND<br>disorder*) OR trisom*<br>21 OR (down* AND<br>syndrom*) |
| 30<br>31<br>32<br>33<br>34<br>35<br>36<br>37<br>38                               | Example<br>search<br>string for<br>SCOPUS | TITLE-ABS-KEY ( ( assess* OR diagnosti* OR screen OR screening*<br>OR instrument* OR tool* OR measure* OR questionnaire* OR<br>psychometr* OR scale* OR interview* ) AND ( dement* OR alzheimer*<br>) AND ( ( ( intellectual* OR learning ) AND disab* ) OR ( intellectual*<br>AND developmental* AND disorder* ) OR trisom* 21 OR ( down*<br>AND syndrom* ) ) ) AND PUBYEAR > 2011 |                                  |                                                                                                                                                      |

167

168 Inclusion criteria for the first search will be: (1) studies need to focus on assessing dementia  
169 in persons with ID, (2) describe the development or evaluation of an informant-based  
170 instrument for the assessment of dementia, (3) and this instrument has to be especially  
171 developed or adapted for persons with ID. Exclusion criteria: (1) classification systems like  
172 ICD-11, DSM-5, (2) scales including dementia, but focusing on a broader spectrum of  
173 disorders for screening purposes or differential diagnosis, such as the *Psychiatric Assessment*  
174 *Schedule for Adult with Developmental Disability* (PAS-ADD).[34]

175 Second search

176 Once we have identified the instruments, we will conduct a search by citation strategy using

1  
2  
3 177 the initial publications of each instrument as a reference point. This search strategy was  
4  
5 178 chosen on the assumption that a paper evaluating an instrument would surely cite the initial  
6  
7 179 publication of the respective instrument. The papers used as reference points will also be  
8  
9 180 included in the further appraisal of the literature. For published papers, we will use five  
10  
11 181 international databases allowing a search by citation strategy, including ERIC, PsycInfo,  
12  
13 182 MEDLINE, Scopus, and Web of Science. For published manuals, not listed in at least one of  
14  
15 183 the five databases, we will use Google Scholar. Additionally, all records fulfilling the  
16  
17 184 inclusion and exclusion criteria of the first search will be transferred and examined in the  
18  
19 185 second search.  
20  
21  
22  
23

24 186 The following inclusion criterion will be used in the second search: (1) studies need to  
25  
26 187 describe an evaluation of the respective instrument in persons with ID. Exclusion criteria  
27  
28 188 comprise: (1) the respective instrument was used primarily for other investigations, not related  
29  
30 189 to an evaluation of the instrument, (2) or the study is a review on assessment instruments, not  
31  
32 190 providing novel information.  
33  
34  
35

36 191 To further include grey and unpublished literature in both searches, we will apply an invisible  
37  
38 192 college approach, contacting authors in the field for information or manuscripts on this topic,  
39  
40 193 and we will follow up on meeting abstracts. Full texts of reviews on assessment instruments  
41  
42 194 identified in the course of the two searches will be screened for possible further studies to  
43  
44 195 include. References of papers meeting the inclusion criteria will be hand-searched. We will  
45  
46 196 re-run both searches before the final analyses to include the most recent publications.  
47  
48  
49  
50

51 197 For study selection, one reviewer will exclude duplicates. All remaining records will be  
52  
53 198 screened and reviewed for eligibility by two team members independently, i.e. blinded to each  
54  
55 199 other's decisions. In the case of disagreement, dissonances will be discussed until agreement  
56  
57 200 is reached. In the case of non-agreement, a third team member will be included in discussion.  
58  
59  
60

## 201 **Data extraction**

202 The first search will result in a list of instruments. Data extracted will be the names of the  
203 instruments and information on their initial publication(s). In the second search, we will  
204 extract evaluation data of instruments, i.e. measurement properties and characteristics as listed  
205 in the COSMIN checklists and the CAPs-IDD. For each characteristic/property extracted, we  
206 will record the study design and sample characteristics, including sample size, gender  
207 distribution, age distribution, aetiology of ID, and country (language) in which the instrument  
208 was evaluated. We will include all studies, irrespective of their design.

209 The extraction of all relevant data will be done via standardised and piloted excel  
210 spreadsheets by two team members independently. In the case of disagreement, dissonances  
211 will be discussed until agreement is reached. In the case of non-agreement, a third team  
212 member will be included in discussion. If data necessary for coding is missing in a study, we  
213 will contact the respective study authors for this information.

## 214 **Risk of bias and quality assessment**

215 Quality and risk of bias will be assessed on study level (for each measurement property), on  
216 outcome level (for each assessment instrument), and on an aggregated outcome level,  
217 applying the *Grading of Recommendations, Assessment, Development and Evaluation*  
218 (GRADE) approach. We will combine the COSMIN checklists [35–37] with the CAPs-IDD  
219 [33], a comprehensive tool specifically developed for the evaluation of assessment  
220 instruments for psychiatric disorders in persons with ID. The CAPs-IDD consists of two parts:  
221 (1) conceptual and measurement model (including descriptive aspects of instruments, e.g.  
222 respondent requirements, theoretical foundation), and (2) psychometric properties. We will  
223 only use the first part, as the second part is more comprehensively covered by the COSMIN  
224 checklists.

1  
2  
3 225 All ratings will be done by two reviewers independently. In the case of disagreement,  
4  
5 226 dissonances will be discussed until agreement is reached. In the case of non-agreement, a  
6  
7 227 third team member will be included in the discussion. Initial interrater agreement will be  
8  
9 228 determined using percentage agreement, calculated in R.[38]  
10  
11  
12

13 229 As to publication bias, we assume that evaluation results not in favour of the respective  
14  
15 230 instruments are likely to be underreported. This may be partly due to evaluations being  
16  
17 231 frequently done and published by the developer(s) of the respective instrument. We will  
18  
19 232 address this by including grey literature and by discussing this aspect in the interpretation of  
20  
21 233 our results.  
22  
23  
24

### 25 234 **Strategy for data synthesis**

26  
27 235 A narrative synthesis will be conducted. Assessment instruments will be presented in a table  
28  
29 236 along with descriptive aspects according to CAPs-IDD, and their measurement properties and  
30  
31 237 quality ratings according to the COSMIN checklists. Quantitative data pooling will probably  
32  
33 238 not be possible. This is due to an expected limited number of studies evaluating the same  
34  
35 239 property (e.g. internal consistency) for an instrument, and an expected heterogeneity in the  
36  
37 240 population studied (e.g. severity of ID, persons with Down Syndrome vs. persons with ID of  
38  
39 241 other aetiology). However, if applicable, we will calculate pooled estimates and 95%  
40  
41 242 confidence intervals using R.[38]  
42  
43  
44  
45

### 46 243 **Analysis of subgroups**

47  
48 244 We define persons with Down Syndrome/trisomy 21 (DS) as a special subgroup, as they are  
49  
50 245 more often affected by Alzheimer's dementia, with a suspected earlier onset.[16] We will  
51  
52 246 group instruments according to their intended use, and studies according to their participants  
53  
54 247 in four clusters: (1) persons with ID, including persons with DS, (2) only persons with DS, (3)  
55  
56 248 only persons with ID, not including DS, (4) aetiology of ID not specified. For the fourth  
57  
58 249 cluster, we will contact study authors to determine aetiology of ID in the respective sample or  
59  
60

1  
2  
3 250 for the respective instrument. We will then allocate each study or instrument to the first three  
4  
5 251 clusters according to the information provided by the authors. If no information is provided,  
6  
7 252 the respective study or instrument remains in cluster four.  
8  
9

### 10 253 **Confidence in cumulative evidence**

11  
12  
13 254 The modified GRADE approach as suggested by the COSMIN guidelines[32] will be applied  
14  
15 255 to grade the quality of the evidence.  
16  
17

### 18 256 **Data management**

19  
20 257 We will use ZOTERO for saving records and managing and storing literature, including  
21  
22  
23 258 managing duplicates. For extracting data and recording decisions on quality ratings we will  
24  
25 259 use standardised and piloted excel spreadsheets.  
26  
27

### 28 260 **Patient and public involvement**

29  
30 261 This research was done without patient involvement due to limited resources.  
31  
32

## 33 262 **DISCUSSION**

34  
35 263 This review will summarise measurement properties of available informant-based assessment  
36  
37  
38 264 instruments for persons with ID and give an overview of the quality of each instrument and  
39  
40 265 the quality of available evaluation studies. For each instrument we will depict which  
41  
42 266 psychometric properties are evaluated to what extent, and which properties need further  
43  
44 267 evaluation in future research. This will be the first systematic review of dementia assessment  
45  
46 268 instruments for persons with ID using PRISMA and COSMIN guidelines as well as applying  
47  
48 269 the ID-specific criteria of the CAPs-IDD.  
49  
50

51  
52 270 Our work will highlight gaps in research on these instruments, thus setting the ground for  
53  
54 271 more effective research in the future. The results of this review will inform researchers and  
55  
56 272 clinicians of the quality of available instruments to assess dementia in persons with ID, and  
57  
58 273 guide them in choosing an adequate instrument. This will hopefully contribute to an  
59  
60

1  
2  
3 274 improvement of dementia assessment in persons with ID and a better, earlier, and more  
4  
5 275 adequate provision of healthcare services, as demanded by the UN-CRPD.[24]  
6  
7

8 **276 Ethics and dissemination**  
9

10 277 No ethics statement is needed for this study. The results of this systematic review will be  
11  
12 278 submitted for publication to a leading peer-reviewed journal, and presented at international  
13  
14 279 conferences and congresses in the fields of ID, ageing, and dementia.  
15  
16  
17

18 280  
19

20  
21 **281 Author's contributions**  
22

23 282 ELZ conceived the study, drafted the protocol, and is the guarantor of the review. SK, IZ and  
24  
25 283 FF contributed to study design and drafting the protocol. ELZ, SK, and KW designed and  
26  
27 284 tested the search strategy. FF and IZ tested quality rating tools and software options. All  
28  
29 285 authors read and approved the final protocol.  
30  
31  
32

33 **286 Funding**  
34

35 287 This research received no specific grant from any funding agency in the public, commercial or  
36  
37 288 not-for-profit sectors.  
38  
39  
40

41 **289 Acknowledgments**  
42

43 290 Open access funding provided by University of Vienna.  
44  
45

46 **291 Patient and public involvement**  
47

48 292 This research was done without patient involvement.  
49  
50

51 **293 Competing interests**  
52

53 294 The authors have no competing nor potential conflict interests to declare.  
54  
55

56 **295 Word Count:** 2,566 words.  
57  
58  
59  
60 296

297 **REFERENCES**

- 298 1 Schalock RL, Borthwick-Duffy SA, Bradley VJ, *et al.* *Intellectual Disability: Definition,*  
299 *Classification, and Systems of Supports.* 11th ed. Washington, DC: : American Association  
300 on Intellectual and Developmental Disabilities 2010.
- 301 2 American Psychiatric Association. *Diagnostic and statistical manual of mental disorders.*  
302 Washington, DC: : Author 2013.
- 303 3 World Health Organization. *International classification of diseases (11th Revision).* 2018.  
304 <https://icd.who.int/en>
- 305 4 Holt G, Costello H, Bouras H, *et al.* BIOMED-MEROPE project: service provision for  
306 adults with intellectual disability: a European comparison. *J Intellect Disabil Res*  
307 2000;**44**:685–96. doi:10.1046/j.1365-2788.2000.00312.x
- 308 5 Durkin M. The epidemiology of developmental disabilities in low-income countries. *Ment*  
309 *Retard Dev Disabil Res Rev* 2002;**8**:206–11. doi:10.1002/mrdd.10039
- 310 6 Maulik PK, Mascarenhas MN, Mathers CD, *et al.* Prevalence of intellectual disability: a  
311 meta-analysis of population-based studies. *Res Dev Disabil* 2011;**32**:419–36.  
312 doi:10.1016/j.ridd.2010.12.018
- 313 7 Roeleveld N, Zielhuis GA, Gabreëls F. The prevalence of mental retardation: a critical  
314 review of recent literature. *Dev Med Child Neurol* 1997;**39**:125–32. doi:10.1111/j.1469-  
315 8749.1997.tb07395.x
- 316 8 Strydom A, Hassiotis A, King M, *et al.* The relationship of dementia prevalence in older  
317 adults with intellectual disability (ID) to age and severity of ID. *Psychol Med* 2009;**39**:13–  
318 21. doi:10.1017/S0033291708003334
- 319 9 Strydom A, Chan T, King M, *et al.* Incidence of dementia in older adults with intellectual  
320 disabilities. *Res Dev Disabil* 2013;**34**:1881–1885. doi:10.1016/j.ridd.2013.02.021
- 321 10 Takenoshita S, Terada S, Kuwano R, *et al.* Prevalence of dementia in people with  
322 intellectual disabilities: cross-sectional study. *Int J Geriatr Psychiatry* 2020;**35**:414–22.  
323 doi:10.1002/gps.5258
- 324 11 Folstein MF, Folstein SE, McHugh PR. “Mini-mental state”: a practical method for  
325 grading the cognitive state of patients for the clinician. *J Psychiatr Res* 1975;**12**:189–98.  
326 doi:10.1016/0022-3956(75)90026-6
- 327 12 Burt DB. Issues in dementia assessment methods. In: Prasher VP, ed.  
328 *Neuropsychological Assessment of Dementia in Down Syndrome and Intellectual*  
329 *Disabilities.* Cham, Switzerland: : Springer 2018.
- 330 13 Zeilinger EL, Stiehl KA, Weber G. A systematic review on assessment instruments for  
331 dementia in persons with intellectual disabilities. *Res Dev Disabil* 2013;**34**:3962–3977.  
332 doi:10.1016/j.ridd.2013.08.013



- 1  
2  
3 333 14 Jopp DA, Keys CB. Diagnostic Overshadowing Reviewed and Reconsidered. *Am J*  
4 334 *Ment Retard* 2001;**106**:416–33. doi:10.1352/0895-  
5 335 8017(2001)106<0416:DORAR>2.0.CO;2
- 7 336 15 Mason J, Scior K. ‘Diagnostic Overshadowing’ Amongst Clinicians Working with  
8 337 People with Intellectual Disabilities in the UK. *J Appl Res Intellect Disabil* 2004;**17**:85–90.  
9 338 doi:10.1111/j.1360-2322.2004.00184.x
- 12 339 16 Hartley D, Blumenthal T, Carrillo M, *et al.* Down syndrome and Alzheimer’s disease:  
13 340 Common pathways, common goals. *Alzheimers Dement J Alzheimers Assoc* 2015;**11**:700–  
14 341 9. doi:10.1016/j.jalz.2014.10.007
- 16 342 17 Lautarescu BA, Holland AJ, Zaman SH. The Early Presentation of Dementia in People  
17 343 with Down Syndrome: a Systematic Review of Longitudinal Studies. *Neuropsychol Rev*  
18 344 2017;**1**:31–45. doi:10.1007/s11065-017-9341-9
- 21 345 18 Aylward EH, Burt DB, Thorpe LU, *et al.* Diagnosis of dementia in individuals with  
22 346 intellectual disability. *J Intellect Disabil Res* 1997;**41**:152–64. doi:10.1111/j.1365-  
23 347 2788.1997.tb00692.x
- 25 348 19 Deb S, McHugh R. Dementia among Persons with Down Syndrome. In: Urbano RC,  
26 349 ed. *International Review of Research in Mental Retardation*. Academic Press 2010. 221–  
27 350 55. doi:10.1016/S0074-7750(10)39008-2
- 30 351 20 Kalsy S, Oliver C. The Assessment of Dementia in People with Intellectual  
31 352 Disabilities: Key Assessment Instruments. In: *Assessing Adults with Intellectual*  
32 353 *Disabilities*. John Wiley & Sons, Ltd 2008. 207–19. doi:10.1002/9780470773697.ch15
- 34 354 21 Heller T, Scott HM, Janicki MP. Caregiving, intellectual disability, and dementia:  
35 355 Report of the Summit Workgroup on Caregiving and Intellectual and Developmental  
36 356 Disabilities. *Alzheimers Dement Transl Res Clin Interv* 2018;**4**:272–282.  
37 357 doi:10.1016/j.trci.2018.06.002
- 40 358 22 Robinson L, Tang E, Taylor JP. Dementia: timely diagnosis and early intervention.  
41 359 *BMJ* 2015;**350**:3029. doi:10.1136/bmj.h3029
- 43 360 23 Summers A, MacDonald S. Psychosocial interventions for people with intellectual  
44 361 disabilities and dementia: A systematic review. *J Appl Res Intellect Disabil* 2020;:1–17.
- 46 362 24 United Nations. *Convention on the Rights of Persons with Disabilities*. New York: :  
47 363 United Nations 2006.
- 49 364 25 McKenzie K, Metcalfe D, Murray G. A review of measures used in the screening,  
50 365 assessment and diagnosis of dementia in people with an intellectual disability. *Rev J Appl*  
51 366 *Res Intellect Disabil* 2018;**31**:725–742. doi:10.1111/jar.12441
- 54 367 26 Walton MK, Powers JH, Hobart J, *et al.* Clinical Outcome Assessments: Conceptual  
55 368 Foundation—Report of the ISPOR Clinical Outcomes Assessment – Emerging Good  
56 369 Practices for Outcomes Research Task Force. *Value Health* 2015;**18**:741–52.  
57 370 doi:10.1016/j.jval.2015.08.006
- 59 371 27 Elliott-King J, Shaw S, Bandelow S, *et al.* A critical literature review of the  
60 372 effectiveness of various instruments in the diagnosis of dementia in adults with intellectual

- 1  
2  
3 373 disabilities. *Alzheimers Dement Diagn Assess Dis Monit* 2016;**4**:126–48.  
4 374 doi:10.1016/j.dadm.2016.06.002  
5  
6 375 28 Sabbagh M, Edgin J. Clinical assessment of cognitive decline in adults with Down  
7 376 syndrome. *Curr Alzheimer Res* 2016;**13**:30–4. doi:10.2174/1567205012666150921095724  
8  
9 377 29 Moher D, Liberati A, Tetzlaff J, *et al.* Preferred Reporting Items for Systematic  
10 378 Reviews and Meta-Analyses: The PRISMA Statement. *Ann Intern Med* 2009;**151**:264.  
11 379 doi:10.7326/0003-4819-151-4-200908180-00135  
12  
13  
14 380 30 Moher D, Shamseer L, Clarke M, *et al.* Preferred reporting items for systematic  
15 381 review and meta-analysis protocols (PRISMA-P) 2015 statement. *Syst Rev* 2015;**4**:1.  
16 382 doi:10.1186/2046-4053-4-1  
17  
18 383 31 Shamseer L, Moher D, Clarke M, *et al.* Preferred reporting items for systematic  
19 384 review and meta-analysis protocols (PRISMA-P) 2015: elaboration and explanation. *BMJ*  
20 385 2015;**349**. doi:10.1136/bmj.g7647  
21  
22  
23 386 32 Prinsen CAC, Mokkink LB, Bouter LM, *et al.* COSMIN guideline for systematic  
24 387 reviews of patient-reported outcome measures. *Qual Life Res* 2018;**27**:1147–57.  
25 388 doi:10.1007/s11136-018-1798-3  
26  
27 389 33 Zeilinger EL, Nader IW, Brehmer-Rinderer B, *et al.* CAPs-IDD: Characteristics of  
28 390 Assessment Instruments for Psychiatric Disorders in Persons with Intellectual  
29 391 Developmental Disorders. *J Intellect Disabil Res* 2013;**57**:737–46. doi:10.1111/jir.12003  
30  
31  
32 392 34 Moss S, Patel P, Prosser H, *et al.* Psychiatric Morbidity in Older People with  
33 393 Moderate and Severe Learning Disability: I: Development and Reliability of the Patient  
34 394 Interview (PAS-ADD). *Br J Psychiatry* 1993;**163**:471–80. doi:10.1192/bjp.163.4.471  
35  
36 395 35 Mokkink LB, Prinsen C, Patrick DL, *et al.* *COSMIN methodology for systematic*  
37 396 *reviews of patient-reported outcome measures (PROMs) - user manual*. Amsterdam, The  
38 397 Netherlands: : VU University Medical Center 2018.  
39  
40  
41 398 36 Terwee CB, Prinsen CA, Chiarotto A, *et al.* *COSMIN methodology for assessing the*  
42 399 *content validity of PROMs – user manual*. Amsterdam, The Netherlands: : VU University  
43 400 Medical Center 2018.  
44  
45 401 37 Mokkink LB, de Vet HCW, Prinsen CAC, *et al.* COSMIN Risk of Bias checklist for  
46 402 systematic reviews of Patient-Reported Outcome Measures. *Qual Life Res* 2018;**27**:1171–  
47 403 9. doi:10.1007/s11136-017-1765-4  
48  
49  
50 404 38 R Core Team. *R: A Language and Environment for Statistical Computing*. Vienna,  
51 405 Austria: : R Foundation for Statistical Computing 2020. <https://www.R-project.org/>  
52  
53 406  
54  
55 407  
56  
57  
58 408  
59  
60 409

1  
2  
3 410 **Figure legends**  
4  
5

6 411 Figure 1: PRISMA flow chart of first search  
7

8  
9 412 Figure 2: PRISMA flow chart of second search  
10  
11  
12  
13  
14  
15  
16  
17  
18  
19  
20  
21  
22  
23  
24  
25  
26  
27  
28  
29  
30  
31  
32  
33  
34  
35  
36  
37  
38  
39  
40  
41  
42  
43  
44  
45  
46  
47  
48  
49  
50  
51  
52  
53  
54  
55  
56  
57  
58  
59  
60

For peer review only

1  
2  
3  
4  
5  
6  
7  
8  
9  
10  
11  
12  
13  
14  
15  
16  
17  
18  
19  
20  
21  
22  
23  
24  
25  
26  
27  
28  
29  
30  
31  
32  
33  
34  
35  
36  
37  
38  
39  
40  
41  
42  
43  
44  
45  
46  
47  
48  
49  
50  
51  
52  
53  
54  
55  
56  
57  
58  
59  
60



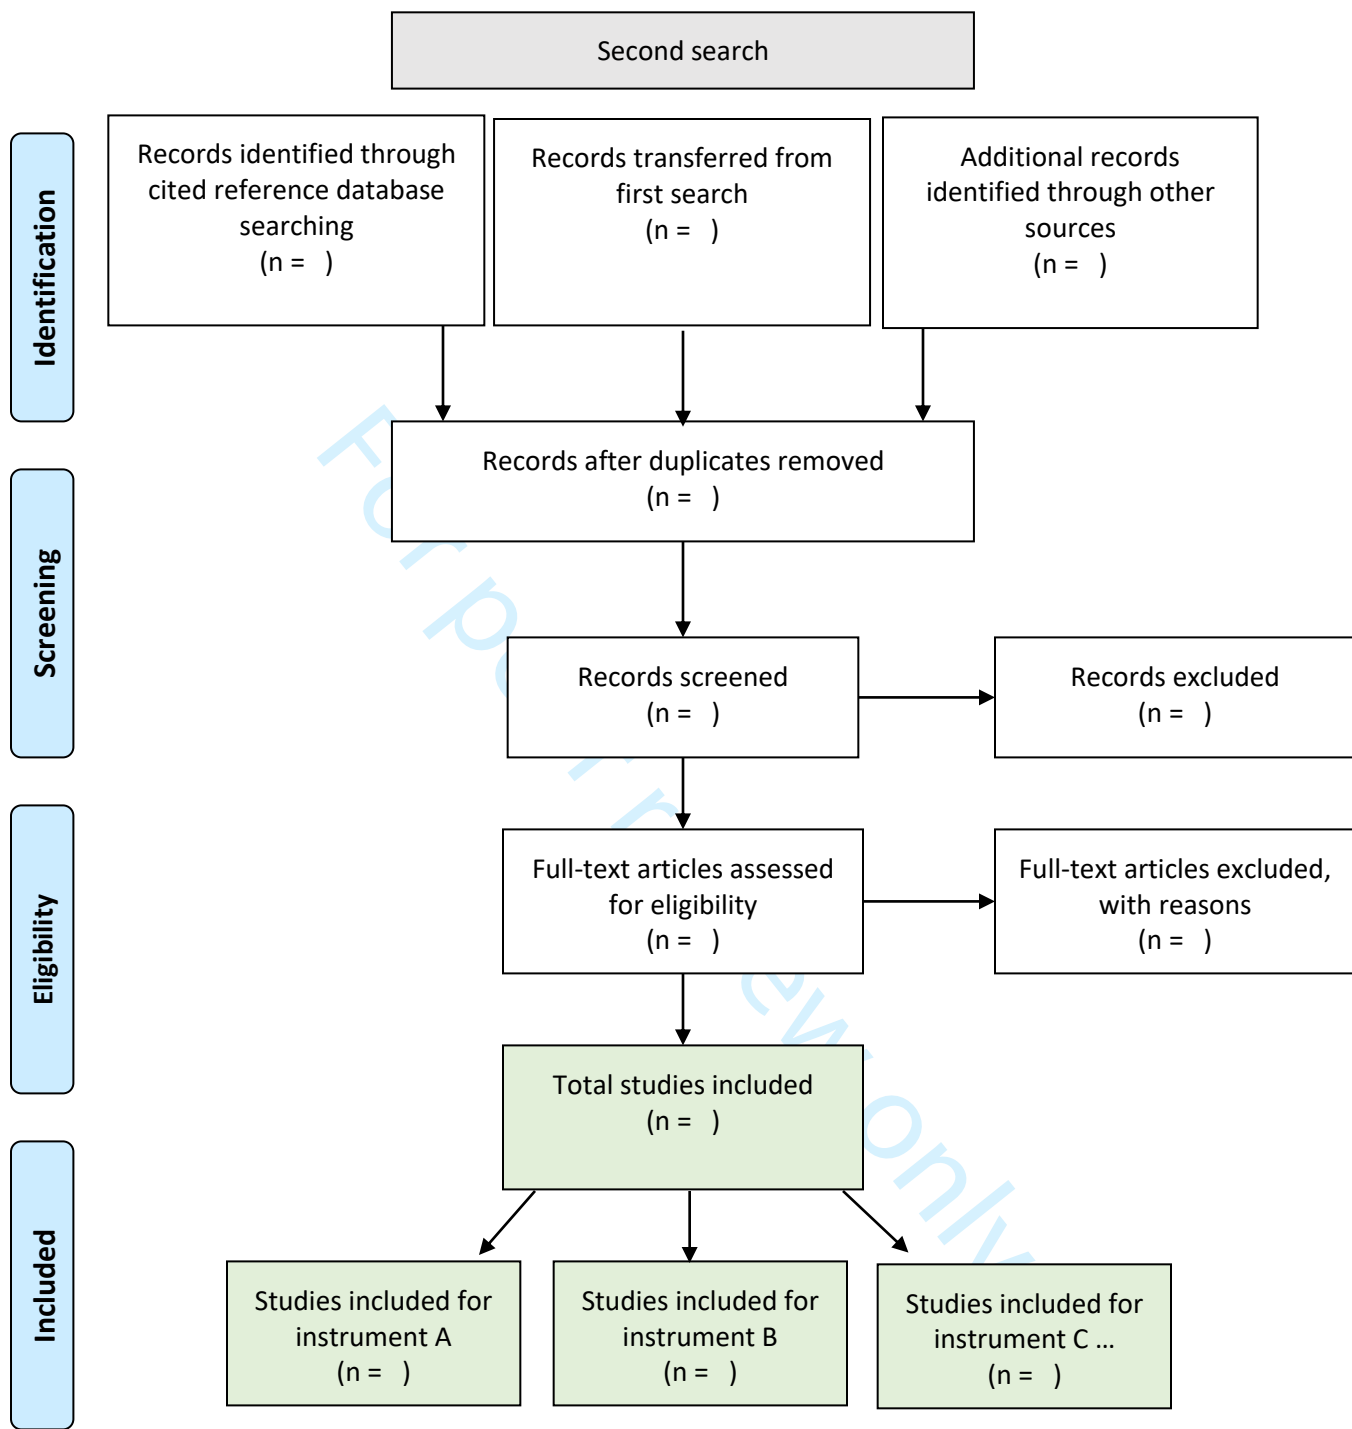

## Supplementary information

### Informant-based assessment instruments for dementia and their measurement properties in persons with intellectual disability: a systematic review protocol

Detailed search strategy in electronic databases

#### ASSIA

(via ProQuest)

noft(Assess\* OR diagnosti\* OR screen OR screening\* OR instrument\* OR tool\* OR measure\* OR questionnaire\* OR psychometr\* OR scale\* OR interview\*) AND noft(Dement\* OR Alzheimer\*) AND noft(((intellectual\* OR learning) AND disab\*) OR (intellectual\* AND developmental\* AND disorder\*) OR trisom\* 21 OR (down\* AND syndrom\*))

Additional limits: Date: From 2012 to 2020

#### CINAHL

(via EBSCOhost) (MEDLINE records excluded, since they are already in the MEDLINE Search):

(AB ( Assess\* OR diagnosti\* OR screen OR screening\* OR instrument\* OR tool\* OR measure\* OR questionnaire\* OR psychometr\* OR scale\* OR interview\* ) AND AB ( Dement\* OR Alzheimer\* ) AND AB ( ((intellectual\* OR learning) AND disab\*) OR (intellectual\* AND developmental\* AND disorder\*) OR trisom\* 21 OR (down\* AND syndrom\*) ) ) OR (TI ( Assess\* OR diagnosti\* OR screen OR screening\* OR instrument\* OR tool\* OR measure\* OR questionnaire\* OR psychometr\* OR scale\* OR interview\* ) AND TI ( Dement\* OR Alzheimer\* ) AND TI ( ((intellectual\* OR learning) AND disab\*) OR (intellectual\* AND developmental\* AND disorder\*) OR trisom\* 21 OR (down\* AND syndrom\*) ) ) OR (SU ( Assess\* OR diagnosti\* OR screen OR screening\* OR instrument\* OR tool\* OR measure\* OR questionnaire\* OR psychometr\* OR scale\* OR interview\* ) AND SU ( Dement\* OR Alzheimer\* ) AND SU ( ((intellectual\* OR learning) AND disab\*) OR (intellectual\* AND developmental\* AND disorder\*) OR trisom\* 21 OR (down\* AND syndrom\*) ) ) )

**Limiters** - Published Date: 20120101-20201231; Exclude MEDLINE records

#### Cochrane Library

(Assess\* OR diagnosti\* OR screen OR screening\* OR instrument\* OR tool\* OR measure\* OR questionnaire\* OR psychometr\* OR scale\* OR interview\*):ti,ab,kw AND (Dement\* OR Alzheimer\*):ti,ab,kw AND (((intellectual\* OR learning) AND disab\*) OR (intellectual\* AND developmental\* AND disorder\*) OR trisom\* 21 OR (down\* AND syndrom\*)):ti,ab,kw

with Cochrane Library publication date from Jan 2012 to Dec 2020

**ERIC, MEDLINE, and PsycInfo**

(via Ovid) [mp=ab, ti, hw, id, tc, ot, tm, mh]

((Assess\* or diagnosti\* or screen or screening\* or instrument\* or tool\* or measure\* or questionnaire\* or psychometr\* or scale\* or interview\*) and (Dement\* or Alzheimer\*) and (((intellectual\* or learning) and disab\*) or (intellectual\* and developmental\* and disorder\*) or trisom\* 21 or (down\* and syndrom\*))).mp

limit to yr="2012 - 2020"

**SCOPUS**

TITLE-ABS-KEY ( ( assess\* OR diagnosti\* OR screen OR screening\* OR instrument\* OR tool\* OR measure\* OR questionnaire\* OR psychometr\* OR scale\* OR interview\* ) AND ( dement\* OR alzheimer\* ) AND ( ( ( intellectual\* OR learning ) AND disab\* ) OR ( intellectual\* AND developmental\* AND disorder\* ) OR trisom\* 21 OR ( down\* AND syndrom\* ) ) ) AND PUBYEAR > 2011

**Web of Science Core Collection:**

**TOPIC:**(Assess\* OR diagnosti\* OR screen OR screening\* OR instrument\* OR tool\* OR measure\* OR questionnaire\* OR psychometr\* OR scale\* OR interview\*) AND

**TOPIC:**(Dement\* OR Alzheimer\*) AND

**TOPIC:**((intellectual\* OR learning) AND disab\*) OR (intellectual\* AND developmental\* AND disorder\*) OR trisom\* 21 OR (down\* AND syndrom\*)

**Timespan:** 2012-2020. **Indexes:** SCI-EXPANDED, SSCI, A&HCI, CPCI-S, CPCI-SSH, BKCI-S, BKCI-SSH, ESCI, CCR-EXPANDED, IC.

**OpenGrey**

(Assess\* OR diagnosti\* OR screen OR screening\* OR instrument\* OR tool\* OR measure\* OR questionnaire\* OR psychometr\* OR scale\* OR interview\*) AND

(Dement\* OR Alzheimer\*) AND

((intellectual\* OR learning) AND disab\*) OR (intellectual\* AND developmental\* AND disorder\*) OR trisom\* 21 OR (down\* AND syndrom\*)

**ProQuest Dissertations & Theses**

noft(Assess\* OR diagnosti\* OR screen OR screening\* OR instrument\* OR tool\* OR measure\* OR questionnaire\* OR psychometr\* OR scale\* OR interview\*) AND

noft(Dement\* OR Alzheimer\*) AND noft(((intellectual\* OR learning) AND disab\*) OR (intellectual\* AND developmental\* AND disorder\*) OR trisom\* 21 OR (down\* AND syndrom\*))

Additional limits: Date: From 2012 to 2020

# Reporting checklist for protocol of a systematic review.

Based on the PRISMA-P guidelines.

## Instructions to authors

Complete this checklist by entering the page numbers from your manuscript where readers will find each of the items listed below.

Your article may not currently address all the items on the checklist. Please modify your text to include the missing information. If you are certain that an item does not apply, please write "n/a" and provide a short explanation.

Upload your completed checklist as an extra file when you submit to a journal.

In your methods section, say that you used the PRISMA-Reporting guidelines, and cite them as:

Moher D, Shamseer L, Clarke M, Ghersi D, Liberati A, Petticrew M, Shekelle P, Stewart LA. Preferred Reporting Items for Systematic Review and Meta-Analysis Protocols (PRISMA-P) 2015 statement. Syst Rev. 2015;4(1):1.

|                |                     |                                                          | Page   | Line   |
|----------------|---------------------|----------------------------------------------------------|--------|--------|
|                |                     | Reporting Item                                           | Number | Number |
| <b>Title</b>   |                     |                                                          |        |        |
| Identification | <a href="#">#1a</a> | Identify the report as a protocol of a systematic review | 1      | 2-3    |



|    |                     |                     |                                                 |      |         |
|----|---------------------|---------------------|-------------------------------------------------|------|---------|
| 1  | Update              | <a href="#">#1b</a> | If the protocol is for an update of a previous  | n.a. |         |
| 2  |                     |                     | systematic review, identify as such             |      |         |
| 3  |                     |                     |                                                 |      |         |
| 4  |                     |                     |                                                 |      |         |
| 5  |                     |                     |                                                 |      |         |
| 6  | <b>Registration</b> |                     |                                                 |      |         |
| 7  |                     |                     |                                                 |      |         |
| 8  |                     |                     |                                                 |      |         |
| 9  |                     |                     |                                                 |      |         |
| 10 |                     | <a href="#">#2</a>  | If registered, provide the name of the registry | 6    | 141-142 |
| 11 |                     |                     | (such as PROSPERO) and registration             |      |         |
| 12 |                     |                     | number                                          |      |         |
| 13 |                     |                     |                                                 |      |         |
| 14 |                     |                     |                                                 |      |         |
| 15 |                     |                     |                                                 |      |         |
| 16 |                     |                     |                                                 |      |         |
| 17 | <b>Authors</b>      |                     |                                                 |      |         |
| 18 |                     |                     |                                                 |      |         |
| 19 |                     |                     |                                                 |      |         |
| 20 | Contact             | <a href="#">#3a</a> | Provide name, institutional affiliation, e-mail | 1    | 5-20    |
| 21 |                     |                     | address of all protocol authors; provide        |      |         |
| 22 |                     |                     | physical mailing address of corresponding       |      |         |
| 23 |                     |                     | author                                          |      |         |
| 24 |                     |                     |                                                 |      |         |
| 25 |                     |                     |                                                 |      |         |
| 26 |                     |                     |                                                 |      |         |
| 27 |                     |                     |                                                 |      |         |
| 28 |                     |                     |                                                 |      |         |
| 29 |                     |                     |                                                 |      |         |
| 30 | Contribution        | <a href="#">#3b</a> | Describe contributions of protocol authors and  | 13   | 279-283 |
| 31 |                     |                     | identify the guarantor of the review            |      |         |
| 32 |                     |                     |                                                 |      |         |
| 33 |                     |                     |                                                 |      |         |
| 34 |                     |                     |                                                 |      |         |
| 35 | <b>Amendments</b>   |                     |                                                 |      |         |
| 36 |                     |                     |                                                 |      |         |
| 37 |                     |                     |                                                 |      |         |
| 38 |                     |                     |                                                 |      |         |
| 39 |                     | <a href="#">#4</a>  | If the protocol represents an amendment of a    | 6    | 142-144 |
| 40 |                     |                     | previously completed or published protocol,     |      |         |
| 41 |                     |                     | identify as such and list changes; otherwise,   |      |         |
| 42 |                     |                     | state plan for documenting important protocol   |      |         |
| 43 |                     |                     | amendments                                      |      |         |
| 44 |                     |                     |                                                 |      |         |
| 45 |                     |                     |                                                 |      |         |
| 46 |                     |                     |                                                 |      |         |
| 47 |                     |                     |                                                 |      |         |
| 48 |                     |                     |                                                 |      |         |
| 49 |                     |                     |                                                 |      |         |
| 50 |                     |                     |                                                 |      |         |
| 51 | <b>Support</b>      |                     |                                                 |      |         |
| 52 |                     |                     |                                                 |      |         |
| 53 |                     |                     |                                                 |      |         |
| 54 | Sources             | <a href="#">#5a</a> | Indicate sources of financial or other support  | 13   | 284-286 |
| 55 |                     |                     | for the review                                  |      |         |
| 56 |                     |                     |                                                 |      |         |
| 57 |                     |                     |                                                 |      |         |
| 58 |                     |                     |                                                 |      |         |
| 59 |                     |                     |                                                 |      |         |
| 60 |                     |                     |                                                 |      |         |

|    |                      |                     |                                                    |        |          |
|----|----------------------|---------------------|----------------------------------------------------|--------|----------|
| 1  | Sponsor              | <a href="#">#5b</a> | Provide name for the review funder and / or        | n.a.   |          |
| 2  |                      |                     | sponsor                                            |        |          |
| 3  |                      |                     |                                                    |        |          |
| 4  |                      |                     |                                                    |        |          |
| 5  |                      |                     |                                                    |        |          |
| 6  | Role of sponsor      | <a href="#">#5c</a> | Describe roles of funder(s), sponsor(s), and /     | n.a.   |          |
| 7  | or funder            |                     | or institution(s), if any, in developing the       |        |          |
| 8  |                      |                     | protocol                                           |        |          |
| 9  |                      |                     |                                                    |        |          |
| 10 |                      |                     |                                                    |        |          |
| 11 |                      |                     |                                                    |        |          |
| 12 |                      |                     |                                                    |        |          |
| 13 |                      |                     |                                                    |        |          |
| 14 | <b>Introduction</b>  |                     |                                                    |        |          |
| 15 |                      |                     |                                                    |        |          |
| 16 |                      |                     |                                                    |        |          |
| 17 | Rationale            | <a href="#">#6</a>  | Describe the rationale for the review in the       | 5-6    | 105-122  |
| 18 |                      |                     | context of what is already known                   |        |          |
| 19 |                      |                     |                                                    |        |          |
| 20 |                      |                     |                                                    |        |          |
| 21 |                      |                     |                                                    |        |          |
| 22 | Objectives           | <a href="#">#7</a>  | Provide an explicit statement of the               | 6      | 126-131  |
| 23 |                      |                     | question(s) the review will address with           |        |          |
| 24 |                      |                     | reference to participants, interventions,          |        |          |
| 25 |                      |                     | comparators, and outcomes (PICO)                   |        |          |
| 26 |                      |                     |                                                    |        |          |
| 27 |                      |                     |                                                    |        |          |
| 28 |                      |                     |                                                    |        |          |
| 29 |                      |                     |                                                    |        |          |
| 30 |                      |                     |                                                    |        |          |
| 31 |                      |                     |                                                    |        |          |
| 32 | <b>Methods</b>       |                     |                                                    |        |          |
| 33 |                      |                     |                                                    |        |          |
| 34 |                      |                     |                                                    |        |          |
| 35 | Eligibility criteria | <a href="#">#8</a>  | Specify the study characteristics (such as         | 7-8, 9 | 157-172, |
| 36 |                      |                     | PICO, study design, setting, time frame) and       |        | 180-188  |
| 37 |                      |                     | report characteristics (such as years              |        |          |
| 38 |                      |                     | considered, language, publication status) to       |        |          |
| 39 |                      |                     | be used as criteria for eligibility for the review |        |          |
| 40 |                      |                     |                                                    |        |          |
| 41 |                      |                     |                                                    |        |          |
| 42 |                      |                     |                                                    |        |          |
| 43 |                      |                     |                                                    |        |          |
| 44 |                      |                     |                                                    |        |          |
| 45 |                      |                     |                                                    |        |          |
| 46 |                      |                     |                                                    |        |          |
| 47 |                      |                     |                                                    |        |          |
| 48 | Information          | <a href="#">#9</a>  | Describe all intended information sources          | 7, 9   | 152-154, |
| 49 | sources              |                     | (such as electronic databases, contact with        |        | 178-181, |
| 50 |                      |                     | study authors, trial registers or other grey       |        | 189-194  |
| 51 |                      |                     | literature sources) with planned dates of          |        |          |
| 52 |                      |                     | coverage                                           |        |          |
| 53 |                      |                     |                                                    |        |          |
| 54 |                      |                     |                                                    |        |          |
| 55 |                      |                     |                                                    |        |          |
| 56 |                      |                     |                                                    |        |          |
| 57 |                      |                     |                                                    |        |          |
| 58 |                      |                     |                                                    |        |          |
| 59 |                      |                     |                                                    |        |          |
| 60 |                      |                     |                                                    |        |          |

|    |                 |                      |                                                   |            |         |
|----|-----------------|----------------------|---------------------------------------------------|------------|---------|
| 1  | Search strategy | <a href="#">#10</a>  | Present draft of search strategy to be used for   | 8;         | 164-165 |
| 2  |                 |                      |                                                   |            |         |
| 3  |                 |                      |                                                   |            |         |
| 4  |                 |                      | at least one electronic database, including       | supplement |         |
| 5  |                 |                      |                                                   |            |         |
| 6  |                 |                      | planned limits, such that it could be repeated    |            |         |
| 7  |                 |                      |                                                   |            |         |
| 8  |                 |                      |                                                   |            |         |
| 9  | Study records - | <a href="#">#11a</a> | Describe the mechanism(s) that will be used       | 12         | 254-257 |
| 10 |                 |                      |                                                   |            |         |
| 11 | data            |                      | to manage records and data throughout the         |            |         |
| 12 |                 |                      |                                                   |            |         |
| 13 | management      |                      | review                                            |            |         |
| 14 |                 |                      |                                                   |            |         |
| 15 |                 |                      |                                                   |            |         |
| 16 | Study records - | <a href="#">#11b</a> | State the process that will be used for           | 9          | 195-198 |
| 17 |                 |                      |                                                   |            |         |
| 18 | selection       |                      | selecting studies (such as two independent        |            |         |
| 19 |                 |                      |                                                   |            |         |
| 20 | process         |                      | reviewers) through each phase of the review       |            |         |
| 21 |                 |                      |                                                   |            |         |
| 22 |                 |                      | (that is, screening, eligibility and inclusion in |            |         |
| 23 |                 |                      |                                                   |            |         |
| 24 |                 |                      | meta-analysis)                                    |            |         |
| 25 |                 |                      |                                                   |            |         |
| 26 |                 |                      |                                                   |            |         |
| 27 |                 |                      |                                                   |            |         |
| 28 | Study records - | <a href="#">#11c</a> | Describe planned method of extracting data        | 10         | 207-211 |
| 29 |                 |                      |                                                   |            |         |
| 30 | data collection |                      | from reports (such as piloting forms, done        |            |         |
| 31 |                 |                      |                                                   |            |         |
| 32 | process         |                      | independently, in duplicate), any processes       |            |         |
| 33 |                 |                      |                                                   |            |         |
| 34 |                 |                      | for obtaining and confirming data from            |            |         |
| 35 |                 |                      |                                                   |            |         |
| 36 |                 |                      | investigators                                     |            |         |
| 37 |                 |                      |                                                   |            |         |
| 38 |                 |                      |                                                   |            |         |
| 39 |                 |                      |                                                   |            |         |
| 40 |                 |                      |                                                   |            |         |
| 41 | Data items      | <a href="#">#12</a>  | List and define all variables for which data will | 9-10       | 199-206 |
| 42 |                 |                      |                                                   |            |         |
| 43 |                 |                      | be sought (such as PICO items, funding            |            |         |
| 44 |                 |                      |                                                   |            |         |
| 45 |                 |                      | sources), any pre-planned data assumptions        |            |         |
| 46 |                 |                      |                                                   |            |         |
| 47 |                 |                      | and simplifications                               |            |         |
| 48 |                 |                      |                                                   |            |         |
| 49 |                 |                      |                                                   |            |         |
| 50 | Outcomes and    | <a href="#">#13</a>  | List and define all outcomes for which data will  | n.a.       |         |
| 51 |                 |                      |                                                   |            |         |
| 52 | prioritization  |                      | be sought, including prioritization of main and   |            |         |
| 53 |                 |                      |                                                   |            |         |
| 54 |                 |                      | additional outcomes, with rationale               |            |         |
| 55 |                 |                      |                                                   |            |         |
| 56 |                 |                      |                                                   |            |         |
| 57 |                 |                      |                                                   |            |         |
| 58 |                 |                      |                                                   |            |         |
| 59 |                 |                      |                                                   |            |         |
| 60 |                 |                      |                                                   |            |         |

|    |                 |                      |                                                          |       |         |
|----|-----------------|----------------------|----------------------------------------------------------|-------|---------|
| 1  | Risk of bias in | <a href="#">#14</a>  | Describe anticipated methods for assessing               | 10-11 | 212-231 |
| 2  |                 |                      |                                                          |       |         |
| 3  | individual      |                      | risk of bias of individual studies, including            |       |         |
| 4  |                 |                      |                                                          |       |         |
| 5  | studies         |                      | whether this will be done at the outcome or              |       |         |
| 6  |                 |                      |                                                          |       |         |
| 7  |                 |                      | study level, or both; state how this information         |       |         |
| 8  |                 |                      |                                                          |       |         |
| 9  |                 |                      | will be used in data synthesis                           |       |         |
| 10 |                 |                      |                                                          |       |         |
| 11 |                 |                      |                                                          |       |         |
| 12 |                 |                      |                                                          |       |         |
| 13 | Data synthesis  | <a href="#">#15a</a> | Describe criteria under which study data will            | 11    | 235-240 |
| 14 |                 |                      |                                                          |       |         |
| 15 |                 |                      | be quantitatively synthesised                            |       |         |
| 16 |                 |                      |                                                          |       |         |
| 17 |                 |                      |                                                          |       |         |
| 18 | Data synthesis  | <a href="#">#15b</a> | If data are appropriate for quantitative                 | n.a.  |         |
| 19 |                 |                      |                                                          |       |         |
| 20 |                 |                      | synthesis, describe planned summary                      |       |         |
| 21 |                 |                      |                                                          |       |         |
| 22 |                 |                      | measures, methods of handling data and                   |       |         |
| 23 |                 |                      |                                                          |       |         |
| 24 |                 |                      | methods of combining data from studies,                  |       |         |
| 25 |                 |                      |                                                          |       |         |
| 26 |                 |                      | including any planned exploration of                     |       |         |
| 27 |                 |                      |                                                          |       |         |
| 28 |                 |                      | consistency (such as I <sup>2</sup> , Kendall's $\tau$ ) |       |         |
| 29 |                 |                      |                                                          |       |         |
| 30 |                 |                      |                                                          |       |         |
| 31 |                 |                      |                                                          |       |         |
| 32 |                 |                      |                                                          |       |         |
| 33 | Data synthesis  | <a href="#">#15c</a> | Describe any proposed additional analyses                | n.a.  |         |
| 34 |                 |                      |                                                          |       |         |
| 35 |                 |                      | (such as sensitivity or subgroup analyses,               |       |         |
| 36 |                 |                      |                                                          |       |         |
| 37 |                 |                      | meta-regression)                                         |       |         |
| 38 |                 |                      |                                                          |       |         |
| 39 |                 |                      |                                                          |       |         |
| 40 |                 |                      |                                                          |       |         |
| 41 | Data synthesis  | <a href="#">#15d</a> | If quantitative synthesis is not appropriate,            | 11    | 232-235 |
| 42 |                 |                      |                                                          |       |         |
| 43 |                 |                      | describe the type of summary planned                     |       |         |
| 44 |                 |                      |                                                          |       |         |
| 45 |                 |                      |                                                          |       |         |
| 46 | Meta-bias(es)   | <a href="#">#16</a>  | Specify any planned assessment of meta-                  | 11    | 227-231 |
| 47 |                 |                      |                                                          |       |         |
| 48 |                 |                      | bias(es) (such as publication bias across                |       |         |
| 49 |                 |                      |                                                          |       |         |
| 50 |                 |                      | studies, selective reporting within studies)             |       |         |
| 51 |                 |                      |                                                          |       |         |
| 52 |                 |                      |                                                          |       |         |
| 53 |                 |                      |                                                          |       |         |
| 54 |                 |                      |                                                          |       |         |
| 55 |                 |                      |                                                          |       |         |
| 56 |                 |                      |                                                          |       |         |
| 57 |                 |                      |                                                          |       |         |
| 58 |                 |                      |                                                          |       |         |
| 59 |                 |                      |                                                          |       |         |
| 60 |                 |                      |                                                          |       |         |

1 Confidence in [#17](#) Describe how the strength of the body of 12 251-253  
2  
3 cumulative evidence will be assessed (such as GRADE)  
4  
5 evidence  
6  
7

8  
9 None The PRISMA-P checklist is distributed under the terms of the Creative Commons Attribution  
10 License CC-BY 4.0. This checklist can be completed online using <https://www.goodreports.org/>, a tool  
11  
12 made by the [EQUATOR Network](#) in collaboration with [Penelope.ai](#)  
13  
14  
15  
16  
17  
18  
19  
20  
21  
22  
23  
24  
25  
26  
27  
28  
29  
30  
31  
32  
33  
34  
35  
36  
37  
38  
39  
40  
41  
42  
43  
44  
45  
46  
47  
48  
49  
50  
51  
52  
53  
54  
55  
56  
57  
58  
59  
60
