# Supplementary material for: Informant-based assessment instruments for dementia and their measurement properties in persons with intellectual disability: systematic review protocol
Source: PubMed Central journal article supplement — BMJ Open. 2020 Dec 8;10(12):e040920. doi: 10.1136/bmjopen-2020-040920 (PMC7725090; doi:10.1136/bmjopen-2020-040920), 2020-12-08
Supplement: bmjopen-2020-040920supp001.pdf [file bmjopen-2020-040920supp001.pdf]

## Supplementary information

### Informant-based assessment instruments for dementia and their measurement properties in persons with intellectual disability: a systematic review protocol

Detailed search strategy in electronic databases

#### ASSIA

(via ProQuest)

noft(Assess\* OR diagnosti\* OR screen OR screening\* OR instrument\* OR tool\* OR measure\* OR questionnaire\* OR psychometr\* OR scale\* OR interview\*) AND noft(Dement\* OR Alzheimer\*) AND noft(((intellectual\* OR learning) AND disab\*) OR (intellectual\* AND developmental\* AND disorder\*) OR trisom\* 21 OR (down\* AND syndrom\*))

Additional limits: Date: From 2012 to 2020

#### CINAHL

(via EBSCOhost) (MEDLINE records excluded, since they are already in the MEDLINE Search):

(AB ( Assess\* OR diagnosti\* OR screen OR screening\* OR instrument\* OR tool\* OR measure\* OR questionnaire\* OR psychometr\* OR scale\* OR interview\* ) AND AB ( Dement\* OR Alzheimer\* ) AND AB ( ((intellectual\* OR learning) AND disab\*) OR (intellectual\* AND developmental\* AND disorder\*) OR trisom\* 21 OR (down\* AND syndrom\*) ) ) OR (TI ( Assess\* OR diagnosti\* OR screen OR screening\* OR instrument\* OR tool\* OR measure\* OR questionnaire\* OR psychometr\* OR scale\* OR interview\* ) AND TI ( Dement\* OR Alzheimer\* ) AND TI ( ((intellectual\* OR learning) AND disab\*) OR (intellectual\* AND developmental\* AND disorder\*) OR trisom\* 21 OR (down\* AND syndrom\*) ) ) OR (SU ( Assess\* OR diagnosti\* OR screen OR screening\* OR instrument\* OR tool\* OR measure\* OR questionnaire\* OR psychometr\* OR scale\* OR interview\* ) AND SU ( Dement\* OR Alzheimer\* ) AND SU ( ((intellectual\* OR learning) AND disab\*) OR (intellectual\* AND developmental\* AND disorder\*) OR trisom\* 21 OR (down\* AND syndrom\*) ) ) )

**Limiters** - Published Date: 20120101-20201231; Exclude MEDLINE records

#### Cochrane Library

(Assess\* OR diagnosti\* OR screen OR screening\* OR instrument\* OR tool\* OR measure\* OR questionnaire\* OR psychometr\* OR scale\* OR interview\*):ti,ab,kw AND (Dement\* OR Alzheimer\*):ti,ab,kw AND (((intellectual\* OR learning) AND disab\*) OR (intellectual\* AND developmental\* AND disorder\*) OR trisom\* 21 OR (down\* AND syndrom\*)):ti,ab,kw

with Cochrane Library publication date from Jan 2012 to Dec 2020

**ERIC, MEDLINE, and PsycInfo**

(via Ovid) [mp=ab, ti, hw, id, tc, ot, tm, mh]

((Assess\* or diagnosti\* or screen or screening\* or instrument\* or tool\* or measure\* or questionnaire\* or psychometr\* or scale\* or interview\*) and (Dement\* or Alzheimer\*) and (((intellectual\* or learning) and disab\*) or (intellectual\* and developmental\* and disorder\*) or trisom\* 21 or (down\* and syndrom\*))).mp

limit to yr="2012 - 2020"

**SCOPUS**

TITLE-ABS-KEY (( assess\* OR diagnosti\* OR screen OR screening\* OR instrument\* OR tool\* OR measure\* OR questionnaire\* OR psychometr\* OR scale\* OR interview\* ) AND ( dement\* OR alzheimer\* ) AND ((( intellectual\* OR learning ) AND disab\* ) OR ( intellectual\* AND developmental\* AND disorder\* ) OR trisom\* 21 OR ( down\* AND syndrom\* ))) AND PUBYEAR > 2011

**Web of Science Core Collection:**

**TOPIC:**(Assess\* OR diagnosti\* OR screen OR screening\* OR instrument\* OR tool\* OR measure\* OR questionnaire\* OR psychometr\* OR scale\* OR interview\*) AND

**TOPIC:**(Dement\* OR Alzheimer\*) AND

**TOPIC:**(((intellectual\* OR learning) AND disab\*) OR (intellectual\* AND developmental\* AND disorder\*) OR trisom\* 21 OR (down\* AND syndrom\*))

**Timespan:** 2012-2020. **Indexes:** SCI-EXPANDED, SSCI, A&HCI, CPCI-S, CPCI-SSH, BKCI-S, BKCI-SSH, ESCI, CCR-EXPANDED, IC.

**OpenGrey**

(Assess\* OR diagnosti\* OR screen OR screening\* OR instrument\* OR tool\* OR measure\* OR questionnaire\* OR psychometr\* OR scale\* OR interview\*) AND

(Dement\* OR Alzheimer\*) AND

(((intellectual\* OR learning) AND disab\*) OR (intellectual\* AND developmental\* AND disorder\*) OR trisom\* 21 OR (down\* AND syndrom\*))

**ProQuest Dissertations & Theses**

noft(Assess\* OR diagnosti\* OR screen OR screening\* OR instrument\* OR tool\* OR measure\* OR questionnaire\* OR psychometr\* OR scale\* OR interview\*) AND

noft(Dement\* OR Alzheimer\*) AND noft(((intellectual\* OR learning) AND disab\*) OR (intellectual\* AND developmental\* AND disorder\*) OR trisom\* 21 OR (down\* AND syndrom\*))

Additional limits: Date: From 2012 to 2020
